# Supplementary material for: Intermittent versus continuous oxygen saturation monitoring for infants hospitalised with bronchiolitis: study protocol for a pragmatic randomised controlled trial
Source: PubMed Central journal article supplement — BMJ Open. 2018 Apr 20;8(4):e022707. doi: 10.1136/bmjopen-2018-022707 (PMC5914772; doi:10.1136/bmjopen-2018-022707), 2018-04-20
Supplement: bmjopen-2018-022707.draft_revisions.pdf [file bmjopen-2018-022707.draft_revisions.pdf]

# BMJ Open

BMJ Open is committed to open peer review. As part of this commitment we make the peer review history of every article we publish publicly available.

When an article is published we post the peer reviewers' comments and the authors' responses online. We also post the versions of the paper that were used during peer review. These are the versions that the peer review comments apply to.

The versions of the paper that follow are the versions that were submitted during the peer review process. They are not the versions of record or the final published versions. They should not be cited or distributed as the published version of this manuscript.

BMJ Open is an open access journal and the full, final, typeset and author-corrected version of record of the manuscript is available on our site with no access controls, subscription charges or pay-per-view fees (<http://bmjopen.bmj.com>).

If you have any questions on BMJ Open's open peer review process please email [info.bmjopen@bmj.com](mailto:info.bmjopen@bmj.com)

# BMJ Open

## Intermittent vs. continuous oxygen saturation monitoring for infants hospitalized with bronchiolitis: study protocol for a pragmatic randomized controlled trial

|                               |                                                                                                                                                                                                                                                                                                                                                                                                                                                                                                                                                                                                                                                                                                                                                                                                                                                                                                                                                                                                                                                                                                                                                                                |
|-------------------------------|--------------------------------------------------------------------------------------------------------------------------------------------------------------------------------------------------------------------------------------------------------------------------------------------------------------------------------------------------------------------------------------------------------------------------------------------------------------------------------------------------------------------------------------------------------------------------------------------------------------------------------------------------------------------------------------------------------------------------------------------------------------------------------------------------------------------------------------------------------------------------------------------------------------------------------------------------------------------------------------------------------------------------------------------------------------------------------------------------------------------------------------------------------------------------------|
| Journal:                      | <i>BMJ Open</i>                                                                                                                                                                                                                                                                                                                                                                                                                                                                                                                                                                                                                                                                                                                                                                                                                                                                                                                                                                                                                                                                                                                                                                |
| Manuscript ID                 | bmjopen-2018-022707                                                                                                                                                                                                                                                                                                                                                                                                                                                                                                                                                                                                                                                                                                                                                                                                                                                                                                                                                                                                                                                                                                                                                            |
| Article Type:                 | Protocol                                                                                                                                                                                                                                                                                                                                                                                                                                                                                                                                                                                                                                                                                                                                                                                                                                                                                                                                                                                                                                                                                                                                                                       |
| Date Submitted by the Author: | 08-Mar-2018                                                                                                                                                                                                                                                                                                                                                                                                                                                                                                                                                                                                                                                                                                                                                                                                                                                                                                                                                                                                                                                                                                                                                                    |
| Complete List of Authors:     | <p>Mahant, Sanjay; The Hospital for Sick Children, Paediatrics<br/> Wahi, Gita; McMaster University, Department of Health Research Methods, Evidence, and Impact; McMaster University, Department of Pediatrics<br/> Giglia, Luci; McMaster University, Pediatrics<br/> Pound, Catherine; University of Ottawa; Children's Hospital of Eastern Ontario<br/> Kanani, Ronik; North York General Hospital, University of Toronto, Pediatrics<br/> Bayliss, Ann; Trillium Health Partners, University of Toronto<br/> Roy, Madan; McMaster University, Pediatrics<br/> Sakran, Mahmoud; Lakeridge Health, Queens University, Pediatrics<br/> Kozlowski, Natascha; Lakeridge Health<br/> Breein-Reid, Karen; Hospital for Sick Children, Nursing<br/> Lavigne, Mollie; Hospital for Sick Children, Quality and Risk Management<br/> Premji, Laila; Hospital for Sick Children, Pediatrics<br/> Willan, Andy; University of Toronto<br/> Moretti, Myla; The Hospital for Sick Children, University of Toronto, SickKids Research Institute<br/> Schuh, Suzanne; Hospital for Sick Children, Pediatrics<br/> Parkin, Patricia; The Hospital for Sick Children, Pediatric Medicine</p> |
| Keywords:                     | bronchiolitis, pulse oximetry, randomized controlled trial                                                                                                                                                                                                                                                                                                                                                                                                                                                                                                                                                                                                                                                                                                                                                                                                                                                                                                                                                                                                                                                                                                                     |
|                               |                                                                                                                                                                                                                                                                                                                                                                                                                                                                                                                                                                                                                                                                                                                                                                                                                                                                                                                                                                                                                                                                                                                                                                                |

SCHOLARONE™  
Manuscripts

1  
2  
3 **Intermittent vs. continuous oxygen saturation monitoring for infants hospitalized**  
4 **with bronchiolitis: study protocol for a pragmatic randomized controlled trial**  
5

6 Mahant S, Wahi G, Giglia L, Pound C, Kanani R, Bayliss A, Roy M, Sakran M,  
7 Kozlowski N, Breen-Reid K, Lavigne M, Premji L, Moretti ME, Willan A, Schuh S,  
8 Parkin PC  
9

10  
11 Sanjay Mahant MD FRCPC MSc  
12 Associate Professor  
13 Division of Paediatric Medicine, Paediatric Outcomes Research Team (PORT),  
14 Department of Paediatrics and Institute of Health Policy, Management and Evaluation,  
15 University of Toronto; Research Institute, Hospital for Sick Children  
16 555 University Avenue, Toronto, Ontario, Canada  
17 M5G1X8  
18 Email: [sanjay.mahant@sickkids.ca](mailto:sanjay.mahant@sickkids.ca)  
19  
20

21  
22 Gita Wahi MD FRCPC MSc  
23 Assistant Professor  
24 Department of Paediatrics, McMaster University  
25 Hamilton Health Sciences Centre, HSC-3A78  
26 1280 Main Street West  
27 Hamilton, Ontario L8S 4K1  
28 Email: [wahig@mcmaster.ca](mailto:wahig@mcmaster.ca)  
29

30  
31 Luci Giglia MD FRCPC MSc  
32 Associate Professor  
33 Department of Paediatrics, McMaster University  
34 Hamilton Health Sciences Centre, HSC-3N27  
35 1280 Main Street West  
36 Hamilton, Ontario L8S 4K1  
37 Email: [gigliat@mcmaster.ca](mailto:gigliat@mcmaster.ca)  
38  
39

40  
41 Catherine Pound MD FRCPC MSc  
42 Assistant Professor  
43 Department of Paediatrics, University of Ottawa  
44 Children's Hospital of Eastern Ontario  
45 401 Smyth Rd, Ottawa, ON K1H 8L1  
46 Email: [cpound@cheo.on.ca](mailto:cpound@cheo.on.ca)  
47

48  
49 Ronik Kanani MD FRCPC  
50 Assistant Professor, Department of Paediatrics, University of Toronto  
51 North York General Hospital  
52 Email: [ronik.kanani@nygh.on.ca](mailto:ronik.kanani@nygh.on.ca)  
53

54  
55 Ann Bayliss MD FRCPC  
56 Department of Paediatrics, Trillium Health Partners, University of Toronto  
57  
58  
59

1  
2  
3 2200 Eglinton Avenue West  
4 Mississauga, Ontario L5M 2N1  
5 Email: [ann.bayliss@thp.ca](mailto:ann.bayliss@thp.ca)  
6

7  
8 Madan Roy  
9 Associate Professor  
10 Department of Paediatrics, McMaster University  
11 Hamilton Health Sciences Centre, Room 3N11  
12 1280 Main Street West  
13 Hamilton, Ontario L8S 4K1  
14 Email: [roym@mcmaster.ca](mailto:roym@mcmaster.ca)  
15

16  
17 Mahmoud Sakran MD  
18 Assistant Professor, Queens University  
19 Lakeridge Health  
20 Oshawa, Ontario  
21 Email: [msakran@lakeridgehealth.on.ca](mailto:msakran@lakeridgehealth.on.ca)  
22

23  
24 Natascha Kozlowski, MPH  
25 Director, Research  
26 Lakeridge Health  
27 Oshawa, Ontario  
28 Email: [nakozlowski@lakeridgehealth.on.ca](mailto:nakozlowski@lakeridgehealth.on.ca)  
29

30  
31 Karen Breen-Reid, MSN  
32 Manager, Interprofessional Education, Learning Institute  
33 Hospital for Sick Children,  
34 Adjunct Lecturer, Lawrence Bloomberg Faculty of Nursing, University of Toronto  
35 555 University Avenue, Toronto, Ontario  
36 M5G1X8  
37 Email: [Karen.breen-reid@sickkids.ca](mailto:Karen.breen-reid@sickkids.ca)  
38

39  
40 Mollie Lavigne, MSN, NP-Paediatrics  
41 Adjunct Lecturer, Lawrence S. Bloomberg Faculty of Nursing, University of Toronto  
42 The Hospital for Sick Children  
43 555 University Avenue  
44 Toronto, Ontario M5G1X8  
45 [Mollie.lavigne@sickkids.ca](mailto:Mollie.lavigne@sickkids.ca)  
46

47  
48 Laila Premji, MD FRCPC  
49 Division of Paediatric Medicine  
50 Hospital for Sick Children  
51 555 University Avenue, Toronto, Ontario  
52 M5G1X8  
53 Email: [laila.premji@sickkids.ca](mailto:laila.premji@sickkids.ca)  
54  
55  
56  
57  
58  
59

1  
2  
3 Andy R. Willan, PhD  
4 Professor of Biostatistics  
5 Dalla Lana School of Public Health  
6 Ontario Child Health Support Unit  
7 Research Institute, Hospital for Sick Children  
8 555 University Avenue, Toronto, Ontario  
9 M5G1X8  
10  
11 Email: [andy@andywillan.com](mailto:andy@andywillan.com)  
12

13 Myla E. Morretti, PhD  
14 Health Economist,  
15 Clinical Trials Unit-Ontario Child Health Support Unit  
16 The Hospital for Sick Children  
17 555 University Avenue, Toronto, Ontario  
18 M5G1X8  
19  
20 Email: [myla.moretti@sickkids.ca](mailto:myla.moretti@sickkids.ca)  
21

22 Suzanne Schuh MD FRCPC  
23 Professor  
24 Division of Emergency Medicine, Department of Paediatrics, University of Toronto  
25 Research Institute, Hospital for Sick Children  
26 555 University Avenue, Toronto, Ontario  
27 M5G1X8  
28  
29 Email: [suzanne.schuh@sickkids.ca](mailto:suzanne.schuh@sickkids.ca)  
30

31 Patricia C. Parkin MD FRCPC  
32 Professor  
33 Division of Paediatric Medicine, Paediatric Outcomes Research Team (PORT),  
34 Department of Paediatrics and Institute of Health Policy, Management and Evaluation,  
35 University of Toronto; Research Institute, Hospital for Sick Children  
36 555 University Avenue, Toronto, Ontario  
37 M5G1X8  
38  
39 Email: [patricia.parkin@sickkids.ca](mailto:patricia.parkin@sickkids.ca)  
40  
41  
42

43 Corresponding Author:

44  
45 Sanjay Mahant, MD FRCPC MSc  
46 Hospital for Sick Children  
47 555 University Avenue, Toronto, Ontario, Canada  
48 M5G1X8  
49  
50 Email: [sanjay.mahant@sickkids.ca](mailto:sanjay.mahant@sickkids.ca)  
51  
52 Mobile: 416.846.1602  
53  
54 Office: 416.813.5280  
55  
56  
57  
58  
59  
60

1  
2  
3 Keywords: bronchiolitis; pulse oximetry; randomized controlled trial; pragmatic trial;  
4 length of stay; safety; cost  
5

6  
7 Protocol Version date: March 7, 2017  
8

9 Word Count: 4,257  
10  
11  
12  
13  
14  
15  
16  
17  
18  
19  
20  
21  
22  
23  
24  
25  
26  
27  
28  
29  
30  
31  
32  
33  
34  
35  
36  
37  
38  
39  
40  
41  
42  
43  
44  
45  
46  
47  
48  
49  
50  
51  
52  
53  
54  
55  
56  
57  
58  
59  
60

For peer review only

## ABSTRACT

**Introduction:** Bronchiolitis is the most common reason for hospitalization in infants in developed countries. The main focus of hospital care is on supportive care, such as monitoring for hypoxia and supplemental oxygen administration, as active therapies lack effectiveness. Pulse oximetry is used to monitor hypoxia in hospitalized infants and is used either intermittently or continuously. Observational studies have suggested that continuous pulse oximetry use leads to a longer length of hospital stay in stable infants. The use of continuous pulse oximetry may lead to unnecessary clinical intervention due to readings that are of little clinical significance, false positive readings and less reliance on the clinical status. There is a lack of high quality evidence to guide which pulse oximetry monitoring strategy, intermittent or continuous, is superior in infants hospitalized with bronchiolitis with respect to patient and policy-relevant outcomes.

**Methods and analysis:** This is a multi-centre, pragmatic randomized controlled trial comparing two strategies for pulse oximetry monitoring in infants hospitalized for bronchiolitis. Infants aged 1 month to 2 years presenting to Canadian tertiary and community hospitals will be randomized after stabilization to receive either intermittent or continuous oxygen saturation monitoring on the inpatient unit until discharge. The primary outcome is length of hospital stay. Secondary outcomes include additional measures of effectiveness, acceptability, safety and cost. We will need to enroll 210 infants in order to detect a 12-hour difference in length of stay with a type 1 error rate of 5% and a power of 90%.

**Ethics and dissemination:** Research ethics approval has been obtained for this trial. This trial will provide data to guide hospitals and clinicians on the optimal pulse oximetry monitoring strategy in infants hospitalized with bronchiolitis. We will disseminate the findings of this study through peer reviewed publication, professional societies and meetings.

### Trial Registration

Clinicaltrials.gov: NCT02947204

### Keywords

Bronchiolitis, pulse oximetry, randomized controlled trial

### Strengths and limitations of this study

- This pragmatic trial is addressing how to best use pulse oximetry for bronchiolitis, a common hospital condition in children
- The trial is recruiting patients in both community and specialized children's hospitals and measuring outcomes relevant to patients, clinicians and the health system so that the finds are meaningful to the real-world setting
- Clinicians and patients are not blinded to the interventions as we are interested in knowing if knowledge of the treatment arm affects behavior and management decisions.

## List of Abbreviations

RCT: randomized controlled trial

GPIU: general paediatric inpatient unit

PICU: paediatric intensive care unit

ED: emergency department

AAP: American Academy of Paediatrics

CPG: clinical practice guideline

VAS: visual analogue scale

CCRT: critical care response team

RA: research assistant



## INTRODUCTION

Bronchiolitis is the most common acute lower respiratory tract infection that affects infants and young children less than 2 years of age.<sup>1</sup> It presents with a viral upper respiratory prodrome followed by tachypnea, chest retractions, and diffuse crackles, wheeze, or both. It is a leading cause of infant hospitalization and is cumulatively expensive for the health care system.<sup>3,4</sup> Although the illness is self-limited, some infants require hospitalization for fast and labored breathing, hypoxia, and feeding difficulties. Systematic reviews of a large body of evidence have shown minimal effectiveness for a range of active medical treatments, specifically drug therapies including steroids and inhaled bronchodilators.<sup>5-9</sup> Thus, the focus of inpatient management is on supportive care, which includes monitoring vital signs, oxygen supplementation for hypoxia, and nutritional and/or fluid supplementation.

Over the past two decades noninvasive oxygen saturation ( $S_pO_2$ ) monitoring, or pulse oximetry, has been widely available for identifying hypoxia.<sup>10</sup> Pulse oximetry can be used intermittently, such as every 4 hours, or continuously in hospitalized infants with bronchiolitis. Although pulse oximetry was introduced into bronchiolitis hospital management without health technology assessment, it has become common clinical practice to utilize continuous oxygen saturation monitoring at many centres.

Observational studies have suggested that the use of continuous oxygen saturation monitoring in stable hospitalized infants with bronchiolitis may actually unnecessarily prolong hospital stay.<sup>11-13</sup> It has been proposed that continuous monitoring leads to “over monitoring” in stable infants. This leads to greater false positive readings, clinicians reacting to low readings that are not clinically important and less reliance on the clinical status of the infant in decision-making around management and disposition. This then results in a longer duration of oxygen supplementation and/or prolonged observation in hospital. A randomized controlled trial conducted in the emergency department demonstrated clinician overreliance on oxygen saturation monitoring in the management of infants with bronchiolitis.<sup>14</sup> Experts concluded, “the art of medicine and clinical assessment should not be trumped by overreliance on a single physiologic parameter”.<sup>15</sup>

Current clinical practice guidelines from the American Academy of Paediatrics (AAP) have recommended that clinicians “may not choose to use continuous pulse oximetry or administer supplemental oxygen if the saturation exceeds 90%”.<sup>1</sup> Their recommendations are graded as evidence level D (expert opinion, case reports, reasoning from first principles). Subsequent to the guideline publication, the first trial comparing intermittent vs. continuous pulse oximetry monitoring was reported.<sup>16</sup> All infants were randomized upon admission to hospital. Infants randomized to intermittent monitoring were switched after the infants were non-hypoxemic. Length of stay was measured from the time of admission (not from the time of implementation of the intervention) and did not differ based on the oxygen saturation monitoring strategy (48.9 hours for continuous monitoring vs. 46.2 hours for intermittent monitoring;  $P=0.77$ ). Several limitations of this trial include: only inclusion of non-hypoxemic infants for intermittent monitoring; an

1  
2  
3 underpowered study (powered to detect an 18-hour difference in LOS); and initiating  
4 measurement of the primary outcome and some secondary outcomes before  
5 randomization. An expert commentary highlighted the need for further trials.<sup>17</sup>  
6

7  
8 Two broad concerns around health care delivery have emerged that make this trial  
9 especially relevant. One is a concern of the widespread overuse of physiologic  
10 monitoring devices and alarms in hospital care, the resulting alarm fatigue of staff, and  
11 the potential to compromise patient safety.<sup>18, 19, 20</sup> Second is a concern around  
12 overdiagnosis, the detection of an abnormality that does not benefit the patient, and how  
13 it may be harming children.<sup>21</sup> A recent review on overdiagnosis highlighted the detection  
14 of clinically insignificant desaturations using continuous oxygen monitoring in  
15 bronchiolitis as an example of overdiagnosis in children.<sup>21</sup> Given these broad concerns  
16 around overuse of physiologic monitoring and the evidence gap around the most effective  
17 oxygen monitoring strategy for such a common condition as bronchiolitis, high quality  
18 evidence is needed to guide best practices and healthy policy.  
19  
20

## 21 **METHODS**

### 22 **Trial design**

23  
24  
25  
26 This is a six centre, pragmatic randomized controlled superiority trial designed with two  
27 parallel groups with a 1:1 allocation ratio with enrollment occurring over bronchiolitis  
28 seasons (each season from November to May) (see Figure 1 for trial schemata). Trial  
29 recruitment commenced November 2016. This protocol follows SPIRIT guidelines (see  
30 Figure 2 for schedule of enrollment, interventions, and assessment).<sup>22</sup>  
31  
32

#### 33 *Rationale for choice of methods*

34 *Pragmatic* randomized trials seek to answer the question “Does this intervention work  
35 under usual conditions?” and guides trial design decisions in 10 domains.<sup>23</sup> A pragmatic  
36 design will strengthen the generalizability and relevance of the study findings to the  
37 practice setting for which it is intended. We will include patients from both tertiary and  
38 community hospital settings; medical management will be consistent with usual clinical  
39 care; and we will be measuring outcomes that are important to patients and health care  
40 decision makers including cost. This study is embedded within the environment of the  
41 knowledge users who will promote uptake of the intervention and study findings; a study  
42 conducted in several settings of different types (community regional hospital as well as  
43 free-standing children’s hospital) over more than one bronchiolitis season will also  
44 enhance generalizability and knowledge transfer.  
45  
46  
47

48 A pilot study was conducted at one site (The Hospital for Sick Children, Toronto;  
49 clinicaltrials.gov NCT01646606). The pilot study demonstrated feasibility of the trial  
50 processes (i.e. number of eligible subjects, recruitment rate, inclusion/exclusion  
51 procedures, the acceptability of the intervention and willingness to randomize for  
52 clinicians, adherence to interventions, rates of completion of follow-up data) and  
53 provided data for sample size determination for this multi-centre trial.  
54  
55  
56  
57  
58  
59  
60

## Study Setting

This study will occur at three Ontario children's hospitals [The Hospital for Sick Children, Toronto (SickKids), McMaster Children's Hospital, Hamilton, and Children's Hospital of Eastern Ontario (CHEO)] and three Ontario community paediatric centre (Trillium Health Partners, Mississauga, North York General Hospital, Toronto, and Lakeridge Health) on the General Paediatric Inpatient Units (GPIU). Children with bronchiolitis are admitted to the GPIU following initial stabilization and will be eligible for the study. Children with severe bronchiolitis are admitted to the Paediatric Intensive Care Unit (PICU) and will not be eligible for the study.

## Eligibility criteria

Our eligibility criteria reflects our intention of only including infants who are in a stable phase of their hospitalization and not at higher risk of deterioration.

### *Inclusion criteria*

- Age: 4 weeks to 24 months old. Infants less than 4 weeks are at high risk for requiring care in the PICU; infants greater than 24 months do not meet the standard definitions for bronchiolitis.
- First episode of acute bronchiolitis. Infants with recurrent episodes may have an alternate diagnosis such as asthma.
- Clinical diagnosis of bronchiolitis by the attending physician as a constellation of clinical findings on history and physical exam; clinical findings include: a preceding viral upper respiratory infection, presence of wheeze on chest auscultation, and increased respiratory rate.<sup>1</sup>
- Stable Clinical Status:
  - For infants receiving oxygen, clinical status must be stable for 6 hours on the GPIU as defined by all: Stable or decreasing requirement for supplemental oxygen AND a stable or decreasing respiratory rate on at least two measurements; Respiratory rate <70 breaths/minute; Heart Rate <180 beats/minute; Oxygen supplementation <40% FiO<sub>2</sub> or <2 L/min by nasal prongs; not on heated high flow oxygen at time of enrollment.
  - For infants in room air (i.e. no supplemental oxygen), clinical status must be stable (as defined above) for 6 hours and can be assessed from the first vital signs measured in the emergency department.

### *Exclusion criteria*

The exclusion criteria are based on known risk factors for acute clinical deterioration:

- chronic medical condition: congenital heart disease that is cyanotic, hemodynamically significant requiring diuretics, and/or with pulmonary hypertension; chronic lung disease with home oxygen requirement and/or pulmonary hypertension; neuromuscular disease; immunodeficiency; hemoglobinopathy

- premature birth (<35weeks)
  - history of apnea
  - weight < 4kg
  - receiving morphine infusions
- patient on heated high flow oxygen at time of enrollment
  - ICU admission on current admission requiring mechanical or non-invasive ventilation

### **Recruitment Strategy and Baseline Measurements**

Research Assistants (RA) will assess children for eligibility 5 days a week (Monday to Friday) between 0800 and 1800. Recruitment on Saturday and Sunday is permitted if feasible. We will implement the intervention during daytime hours to simulate anticipated practice. Baseline characteristics and covariates, including those known to be associated with the length of stay will be collected prior to randomization: age, sex, history of atopy, parental cigarette smoking, treatments prior to randomization (antibiotics, salbutamol, nebulized epinephrine, steroids, intravenous fluids, nasogastric feeds), feeding adequacy, oxygen supplementation and respiratory rate at time of randomization, and duration from hospital admission to randomization.

### **Interventions**

The target oxygen saturation for oxygen supplementation will be the same for both groups at sites - 90%. Sites that also permit an acceptable oxygen saturation of greater than or equal to 88% while children are asleep (as indicated in their bronchiolitis CPG, order sets, or usual practice) will continue with that practice, in keeping with a pragmatic trial. The target oxygen saturations are based on recommendations from local CPGs, society guidelines and a trial.<sup>1,24</sup> Nurses will measure vital signs every 4 hours.

#### *Intermittent oxygen saturation monitoring group*

Oxygen saturation and vital signs will be measured intermittently at a frequency of every 4 hours by the bedside nurse through the child's hospital stay until discharge. Weaning of oxygen (i.e. when to wean oxygen and by how much) is at the discretion of the attending physicians and nurses and will occur at the 4-hourly time interval. Weaning oxygen more frequently than at the 4-hour usual spot check is permitted. Nurses can perform an additional spot check following the oxygen wean.

#### *Continuous oxygen saturation monitoring group*

Oxygen saturation will be measured continuously through the child's hospital stay until discharge. Weaning of oxygen will be as usual practice and will be left to the discretion of the attending physicians and nurses.

#### *Criteria and Procedures for discontinuing or modifying allocated intervention*

1  
2  
3 In our pilot RCT, no modifications to the allocated intervention occurred. However, the  
4 following criteria will be available for converting the group allocation of intermittent  
5 monitoring to continuous monitoring: severe tachypnea, tachycardia, apnea, and clinical  
6 deterioration as assessed by the attending medical team. The infant will be converted  
7 back to intermittent monitoring when deemed clinically stable by the attending medical  
8 team.  
9

### 10 11 *Strategies to improve adherence*

12 A multi-faceted approach will be taken to support implementation of the trial and  
13 adherence to the allocated arms. Leadership support for the trial will be obtained from  
14 nursing and physician leaders and communicated to the clinical staff. Tailored education  
15 for nurses and physicians, including resident physicians, will occur before and during the  
16 trial using a variety of methods (e.g. small group sessions, distribution of reference  
17 material including pocket cards). Key local opinion leaders for nurses and physicians  
18 were engaged in the trial concept and design and will provide support at sessions.  
19 Research assistants and nurse educators will provide one-on-one support for nurses and  
20 physicians participating in the trial.  
21  
22

### 23 24 *Concomitant care*

25 In keeping with a pragmatic trial design, all infants will receive standard care for  
26 bronchiolitis. A care map has been adapted from the site clinical practice guidelines  
27 (CPG) and order sets which were based on the AAP guidelines and recent systematic  
28 reviews.  
29

## 30 31 **Outcomes**

32  
33 Study outcomes include measures of effectiveness, acceptability of the interventions,  
34 safety, and cost.  
35

### 36 37 *Primary outcome*

38 **Length of Hospital Stay from randomization on the inpatient unit to discharge from**  
39 **hospital (hours).** Length of hospital stay was chosen as the primary outcome as it  
40 represents a clinically meaningful outcome in the context of this acute illness for families  
41 and clinicians.<sup>2</sup> It is important to hospital administrators and the health care system as  
42 hospital stay accounts for a major portion of the large costs associated with  
43 bronchiolitis.<sup>25</sup> It has also been used as the primary outcome in other trials in inpatient  
44 management of bronchiolitis.<sup>16,26,27</sup>  
45

### 46 47 *Secondary outcomes*

48 **Duration of oxygen supplementation from randomization to discontinuation of**  
49 **supplementation (hours)** will be measured from the medical record.  
50

51 **Medical interventions:** performed from time of randomization to discharge: (a) Chest x-  
52 ray (yes/no) (b) Number of blood samples drawn and blood tests (c) Nasopharyngeal tests  
53 for viruses (yes/no) (d) Blood culture (yes/no) (e) Number of bronchodilator treatments  
54 used (f) steroid administration (yes/no) (g) Number of times the nasal passage (or deeper)  
55  
56  
57  
58  
59

1  
2  
3 was suctioned (h) IV fluids initiated (yes/no) and duration (i) nasogastric feeds initiated  
4 (yes/no) and duration  
5

6  
7 **Time from randomization to meeting discharge criteria (hours):** This will be assessed  
8 twice daily (9 am and 4pm) by a RA and defined as: no fever (temperature  $<38^{\circ}\text{C}$ ), no  
9 supplemental oxygen, normal respiratory rate for age [using the World Health  
10 Organization age-specific criteria ( $<50$  breaths/min for 2-12 months,  $<40$  breaths/min for  
11 1 to 5 years)], and adequate feeding [defined as a feeding adequacy score of  $\geq 7$  on a 10  
12 cm visual analogue scale (VAS) feeding adequacy scale].  
13

14  
15 **Length of Hospital Stay from triage in the emergency department:** This will be  
16 defined as the length of time (measured in hours) from triage in the emergency  
17 department to discharge from hospital. This has been chosen as a secondary outcome and  
18 not a primary outcome as the length of time from triage to transfer to the GPIU will not  
19 be influenced by the intervention.  
20

21  
22 **Parent anxiety:** Parents will be asked to rate their level of anxiety at the current time  
23 (state anxiety) and generally (trait anxiety) every 24 hours, using two questions  
24 abstracted from the adult State Trait Anxiety Inventory<sup>28</sup>: “I feel at ease” (state, right  
25 now); “I am a steady person (trait, generally). Response options are: not at all (1);  
26 somewhat (2); moderately so (3); very much so (4).  
27

28  
29 **Number of parent work days missed from randomization to 15 days after discharge:**  
30 The RA will conduct telephone follow-up with the parent.  
31

32  
33 **Nursing satisfaction:** The attending nurse will be asked to complete a 10 mm visual  
34 analogue scale (VAS) to measure their satisfaction with the quality of monitoring for  
35 each participant twice daily (one by the day nurse and one by the night nurse).  
36

### 37 **PICU admission and consultation after randomization.**

38

39 **Unscheduled return to care within 15 days of discharge:** Parents will be phoned after  
40 discharge to record the number of unscheduled visits to an emergency department,  
41 physician’s office, or admission to hospital within 15 days of discharge. Fifteen days  
42 after discharge represents approximately 23 days from onset of symptoms and will  
43 capture the range of duration of symptoms for bronchiolitis.<sup>29</sup> The electronic medical  
44 record will also be reviewed to determine any emergency department visits and any  
45 admissions to hospital and the reasons for the visit.  
46  
47

48 **Mortality:** We will include mortality from any cause during the hospitalization and up to  
49 15 days from discharge.  
50

51 **Cost-Effectiveness:** We will perform a cost-effectiveness analysis (CEA) to determine  
52 the incremental costs (or savings) of intermittent compared to continuous oxygen  
53 saturation monitoring per change in hospital length of stay (in hours). We will take both a  
54 health care system and societal perspective. As there is no anticipated difference in long-  
55  
56  
57  
58  
59  
60



1  
2  
3 term clinical outcomes from this condition or the intervention, our time horizon will be  
4 from admission to 15 days post discharge.<sup>29</sup> All costs, parameter estimates and ranges  
5 will be derived from study data. Standardized methods for the conduct of health  
6 economic evaluations will be followed.  
7

8  
9 **Adherence to assigned intervention group:** Adherence rate (proportion) and reasons for  
10 modifications will be reported for each group.  
11

## 12 **Assignment of Interventions**

### 13 *Allocation*

14  
15 The allocation sequence will be generated using computer-generated random numbers by  
16 the trial biostatistician. Randomization will be stratified by centre. An allocation ratio of  
17 1:1 with random permuted blocks of varying size will be used within centre. Allocation  
18 concealment will be achieved by using a central randomization system using the REDCap  
19 randomization module. The site RA will confirm eligibility and obtain consent; then they  
20 will obtain the participant group assignment through the REDCap application.  
21  
22

### 23 *Blinding*

24  
25 Statisticians and investigators will be blind to the group allocation during the data  
26 analysis. Parents, attending nurses, physicians and research personnel involved with data  
27 collection will not be blinded to the group allocation. It is important that the clinicians  
28 receive the allocated monitoring strategy with fidelity (e.g. are aware that monitoring is  
29 intermittent and that they will not receive saturation readings more frequently) as we are  
30 interested in determining if the oxygen monitoring strategy affects their behaviour and  
31 management decisions. By taking this pragmatic approach, our estimates of effectiveness  
32 will be more applicable to usual care settings.<sup>30,31</sup>  
33  
34

## 35 **Data Collection Methods**

36  
37 The RAs will be embedded in each inpatient unit and will collect data.  
38  
39

### 40 *Health Service Utilization and Cost Data*

41  
42 At the end of the trial, decision support at each of the study sites will provide individual  
43 case-costing for each participant's hospitalization for the index admission. Direct out-of-  
44 pocket costs of caregivers/parents and productivity losses will be obtained directly from  
45 caregivers. A custom data collection form has been developed to measure these costs and  
46 losses upon discharge. It will be administered to participants in both arms of the trial and  
47 can be self-administered or collected via interview with the RA. Any additional health  
48 care utilization, out-of-pocket expenses and productivity losses incurred in the 15 days  
49 after discharge will be obtained by the RA at the follow up call.  
50

## 51 **Data Management**

1  
2  
3 The Ontario Child Health Support Unit at SickKids and CHEO (oschu.ca) will serve as  
4 the trials and data management centre. REDCap software will be used for data  
5 management.  
6

## 7 **Data Monitoring**

8  
9  
10 A Data Monitoring Committee was deemed not to be necessary by research ethics board  
11 (REB). There will be no interim analysis or plans for early trial termination.  
12

## 13 **Statistical Methods**

### 14 *Sample size*

15  
16 **Sample size and recruitment duration:** The primary outcome is length of hospital stay  
17 from time of randomization on the GPIU to discharge. Assuming a median length of  
18 hospital stay from randomization to discharge of 36 hours (from pilot data, published  
19 trials), a type 1 error rate of 0.05 (2 sided), power (1- $\beta$ ) of 90%, 105 subjects per group is  
20 needed to detect a clinically significant difference of 12 hours. There will be no  
21 adjustment due to loss to follow-up as this outcome is assessed in hospital. We believe  
22 that a 12-hour difference between treatment groups is a clinically meaningful difference,  
23 based on consensus with our research team, hospital administrators, and clinical experts.  
24

25  
26 Based on administrative data there are approximately 415 bronchiolitis  
27 admissions per year in total at the 6 sites. Approximately 40% will not meet the eligibility  
28 criteria and of these 30% will not be recruited due to off-season presentation (May to  
29 November) or missed, leaving 174 admissions. Assuming a conservative recruitment rate  
30 of 70% (based on pilot study), we expect approximately 120 recruited patients per  
31 season. Thus, two 6-month seasons, each from mid-November to mid-May, will be  
32 needed to recruit the 210 subjects. This seasonal definition of November to May will  
33 capture the peak months of respiratory viral infections responsible for bronchiolitis.<sup>32</sup>  
34  
35

### 36 *Statistical Analysis*

37  
38 **Primary Outcome:** Data will be analyzed according to intention to treat principles for the  
39 primary outcome. Given that the primary and most secondary outcomes are obtained  
40 during hospitalization, and mortality is rare, it is anticipated that there will be no missing  
41 data. For the outcomes measured after discharge (readmissions and parental work days  
42 missed), outcomes with the available data and lost to follow will be reported.  
43

44  
45 The primary outcome, length of hospital stay (hours) from randomization on the  
46 inpatient unit to discharge, will be described as the ratio of the two medians with the 95%  
47 confidence intervals. Kaplan-Meier-type survival curves will be graphed for both  
48 treatment arms. Since no censoring is anticipated, the arms will be compared using a  
49 Wilcoxon rank-sum test. Since each site will follow one of two oxygen saturation targets  
50 for all their patients, as per their usual practice ( $\geq 90\%$  awake and asleep *OR*  $\geq 90\%$   
51 awake and 88% asleep), a treatment by target interaction will be tested to see if the  
52 treatment effect differs between targets.  
53  
54  
55  
56  
57  
58  
59



1  
2  
3 **Secondary outcomes:** To control for multiple testing, the statistical level for significance  
4 for the secondary outcomes will be set to 0.005, two-sided. For the time-to-event  
5 outcomes (oxygen supplementation, discharge criteria) a Wilcoxon rank-sum test will be  
6 applied. For count data (interventions) a Poisson model will be applied. For continuous  
7 data (parent anxiety, nursing satisfaction) a normal model for repeated observations will  
8 be applied. For binary data (PICU admission, unscheduled readmission, mortality,  
9 adherence) a Fisher exact test will be applied.  
10

11  
12 **Cost-effectiveness analysis:** For the cost-effective analysis costs will be adjusted for  
13 inflation and reported in Canadian dollars. Cost-effectiveness will be expressed as an  
14 incremental cost-effectiveness ratio (ICER), calculated by dividing the incremental costs  
15 between intermittent and continuous oxygen saturation monitoring by the incremental  
16 difference in hospital length of stay.<sup>33,34</sup> Extensive sensitivity analyses will be performed  
17 to evaluate the robustness of the results and evaluate uncertainty in assumptions.  
18 Deterministic one-way sensitivity analysis will be performed with all variables using  
19 ranges obtained from the 95% confidence intervals generated directly from study data.  
20 Probabilistic sensitivity analysis will also be performed to establish a point estimate and  
21 95% confidence interval around the ICER.  
22  
23

## 24 25 **Patient and Public Involvement**

26  
27 Patients and the public were not directly involved in the development of the study (i.e.  
28 research question, outcomes choice, study design, recruitment, assessment of burden of  
29 interventions). Outcomes chosen include those reported as a priority to patients as noted  
30 in the literature.<sup>2,35</sup> Furthermore, we conducted a pilot study to ensure that trial processes  
31 were feasible and acceptable from a patient perspective. Study results will be  
32 disseminated to the public through social media.  
33  
34

## 35 **Ethical and dissemination**

36  
37 We received approval from the Research Ethics Board at all sites. Written informed  
38 consent will be obtained from each participant by the site research staff. Identifiable  
39 personal health information will not be uploaded to the REDCap database. Protocol  
40 amendments will be approved by Research Ethics Boards prior to implementation of  
41 protocol changes. All study investigators will have access to the final trial dataset. The  
42 International Committee of Medical Journal Editors authorship eligibility guidelines will  
43 be used for publications. End of study dissemination activities will be conducted locally  
44 to clinical groups and incorporated into site CPGs; findings will be presented through  
45 webinars and society meetings (e.g. the Paediatric Academic Society, AAP Paediatric  
46 Hospital Medicine meetings, Canadian Paediatric Society), and through social media. We  
47 anticipate publication of findings in a general medical or paediatric journal. We will work  
48 with knowledge users to incorporate the study findings into professional society practice  
49 guidelines.  
50  
51  
52

## 53 **DISCUSSION**

1  
2  
3 Bronchiolitis is one of the most common reasons for hospitalization in infants in the  
4 developed world and accounts for significant health care costs. The use of pulse oximetry  
5 has become common practice in hospitalized infants, however there is no RCT evidence  
6 on how to best use this technology in this practice context. The overall goal of our  
7 pragmatic RCT is to determine whether intermittent vs. continuous pulse oximetry results  
8 in a shorter length of hospital stay in infants with a stable clinical status hospitalized with  
9 bronchiolitis. Secondary outcomes include nursing satisfaction with monitoring, parental  
10 anxiety and days missed from work, and outcomes related to safety (intensive care unit  
11 consultation and admission, revisits after discharge, and mortality).  
12  
13

14  
15 Several aspects of this trial are important to highlight. First, our inclusion criteria were  
16 specifically designed to include infants who are in the stable phase of their illness during  
17 hospitalization and exclude infants at higher risk of deterioration. We took this  
18 conservative approach to maximize safety and promote acceptance of clinicians to the  
19 intermittent monitoring intervention. Second, infants who are on supplemental oxygen  
20 and have a stable clinical status are eligible for randomization. Third, we are using the  
21 same target oxygen saturation in both groups. Fourth, it is important to take a multi-  
22 faceted approach to supporting this practice change to ensure adherence to the allocated  
23 arm and success of the trial. We have obtained support from clinical leadership including  
24 nursing, physicians, respiratory therapists and hospital administrators. We will also target  
25 groups using opinion leaders using small group sessions and support front line clinicians.  
26  
27

28  
29 We took the approach of not blinding clinicians and parents to the allocated monitoring  
30 strategy in this trial for several reasons. First, it is important to simulate the monitoring  
31 strategy intended with fidelity. The act of continuous or intermittent monitoring of  
32 oxygen saturation may alter the clinical assessments of treating nurses and physicians and  
33 their decisions regarding oxygen use and need for additional days of hospitalization as  
34 well as parental perceptions of their child's health. For example, previous researchers  
35 have suggested that continuous oxygen saturation monitoring results in overreliance in  
36 technology and under reliance of clinical assessment, which leads to over use of oxygen  
37 and longer hospital stay. Thus, we are interested in understanding if knowledge of  
38 treatment arm affects clinician behavior and decisions around oxygen use and length of  
39 stay, assuming the same target oxygen saturation of 90% in both groups. By taking this  
40 approach, our estimates of effectiveness will be more applicable to usual care settings. In  
41 pragmatic trials, it has been suggested that unblinded treatment and assessment of clinical  
42 outcomes may be important for the preservation of the 'ecology of care', since blinding  
43 may have a significant effect on patients' experience.<sup>30, 31</sup> Further, the inclusion of  
44 objective outcome measures may reduce the potential for bias resulting from patients'  
45 expectations about the effectiveness of each treatment. Our primary outcome measure is  
46 an objective measure of length of hospital stay. Second, although methods are available  
47 to blind group assignment in monitoring trials (e.g. providing a non-true continuous  
48 reading in between intermittent oximetry spot checks), this would ostensibly result in  
49 comparing two continuous monitoring arms. Third, as we are also measuring discharge  
50 readiness as a secondary outcome (defined by the child's clinical status) we will be able  
51 to assess differences between both arms in discharge readiness and total length of stay.  
52  
53  
54  
55  
56  
57  
58  
59  
60

## REFERENCES

1. Ralston S, Lieberthal AS, Meissner HC, Alverson BK, Baley JE, Gadomski AM et al. Clinical Practice Guideline: The diagnosis, management and prevention of bronchiolitis. *Paediatrics*. Published online October 27, 2014. DOI:10.1542/peds.2014-2742.
2. Smyth RL, Openshaw PJM. Bronchiolitis. *Lancet*. 2006;368:312-322.
3. Shay DK et al. Bronchiolitis-associated hospitalization among US children, 1980-1996. *JAMA*. 1999. 282 (15): 1440-1446.
4. Keren R, Luan X, Localio R, Hall M, McLeoad L, Dai D, Srivastava R. Prioritization of comparative effectiveness research topics in hospital paediatrics. *Arch Pediatr Adol Med*. 2012; 166:1155-1164
5. Spurling GKP, Doust J, Del Mar CB, Eriksson L. Antibiotics for bronchiolitis in children. *Cochrane Database of Systematic Reviews*. 2011, Issue 6. Art. No.: CD005189. DOI: 10.1002/14651858.CD005189.pub3.
6. Hartling L, Bialy LM, Vandermeer B, Tjosvold L, Johnson DW, Plint AC, Klassen TP, Patel H, Fernandes RM. Epinephrine for bronchiolitis. *Cochrane Database of Systematic Reviews*. 2011, Issue 6. Art.No.:CD003123.DOI: 10.1002/14651858.CD003123.pub3.
7. Gadomski AM, Brower M. Bronchodilators for bronchiolitis. *Cochrane Database of Systematic Reviews*. 2010, Issue 12. Art. No.: CD001266. DOI: 10.1002/14651858.CD001266.pub3.
8. Fernandes RM, Bialy LM, Vandermeer B, Tjosvold L, Plint AC, Patel H, Johnson DW, Klassen TP, Hartling L. Glucocorticoids for acute viral bronchiolitis in infants and young children. *Cochrane Database of Systematic Reviews*. 2010, Issue 10. Art. No.: CD004878. DOI: 10.1002/14651858.CD004878.pub3.
9. Hartling L, Fernandes RM, Bialy L, et al. Steroids and bronchodilators for acute bronchiolitis in the first two years of life: Systematic review and meta-analysis. *BMJ*. 2011;342.
10. Fouzas S, Priftis KN, Anthracopoulos MB. Pulse oximetry in paediatric practice. *Paediatrics*. 2011;128(4):740-752.
11. Schroeder AR, Marmor AK, Pantell MD, Newman TB. Impact of pulse oximetry and oxygen therapy on length of stay in bronchiolitis hospitalizations. *Arch Pediatr Adol Med*. 2004. 158: 527-530.
12. Unger S, Cunningham S. Effect of oxygen supplementation on length of stay for infants hospitalized with acute viral bronchiolitis. *Paediatrics*. 2008. 121: 470-475.

- 1  
2  
3 13. Mallory MD, Shay DK, Garrett J, Bordley WC. Bronchiolitis management  
4 preferences and the influence of pulse oximetry and respiratory rate on the decision to  
5 admit. *Paediatrics*. 2003. 111: e45-e51.  
6  
7  
8 14. Schuh S, Freedman S, Coates A, Allen U, Parkin PC, Stephens D, Ungar W, DaSilva  
9 Z, Willan AR. Effect of oximetry on hospitalization in bronchiolitis: A randomized  
10 clinical trial. *JAMA*. 2014;312:712-718. □  
11  
12 15. Vinci R, Bauchner H. Bronchiolitis, deception in research, and clinical decision  
13 making. *JAMA*. 2014;312:699-700. □  
14  
15 16. McCulloh R, Koster M, Ralston S et al. Use of intermittent vs. continuous pulse  
16 oximetry for nonhypoxemic infants and young children hospitalized for bronchiolitis: A  
17 randomized clinical trial. *JAMA Pediatr*.2015;169(10):898-904.  
18  
19 17. Cunningham S. Intermittent monitoring of oxygen saturation in infants and children  
20 with acute bronchiolitis: Peekaboo paediatrics or good clinical care? *JAMA Pediatr*.  
21 2015;169(10), 891-892.  
22  
23 18. Chopra V, McMahon LF. Redesigning hospital alarms for patient safety: Alarmed  
24 and potentially dangerous. *JAMA*. 2014; 311:1199-1200. □  
25  
26 19. Cvach M. Monitor alarm fatigue: An integrative review. *Biomedical Instrumentation*  
27 *and Technology*. 2010; 268-277.  
28  
29 20. The Joint Commission. The Joint Commission Announces 2014 National Patient  
30 Safety Goal.  
31 [http://www.jointcommission.org/assets/1/18/jcp0713\\_announce\\_new\\_nspg.pdf](http://www.jointcommission.org/assets/1/18/jcp0713_announce_new_nspg.pdf). Accessed  
32 March 20, 2015.  
33  
34 21. Coon ER, Quinonez RA, Moyer VA, Schroeder AR. Overdiagnosis: How our  
35 compulsion for diagnosis may be harming children. *Paediatrics*.2014;134:1-11.  
36  
37 22. Chan A-W, Tetzlaff JM, Altman DG et al. SPIRIT 2013 Statement: Defining standard  
38 protocol items for clinical trials. *Ann Intern Med* 2013;158:200-207.  
39  
40 23. Thorpe KE, Zwarenstein M, Oxman AD, Treweek S, Furberg CD, Altman DG, Tunis  
41 S, Bergel E, Harvey I, Magid DJ, Chalkidou K. A pragmatic–explanatory continuum  
42 indicator summary (PRECIS): a tool to help trial designers. *CMAJ*. 2009;180:E47-E57.  
43  
44 24. Cunningham S, Rodriguez A, Adams T, et al. Oxygen saturation targets in infants  
45 with bronchiolitis (BIDS): a double-blind, randomized, equivalence trial. *Lancet*.  
46 2015;386:1041-1048.  
47  
48  
49  
50  
51  
52  
53  
54  
55  
56  
57  
58  
59  
60

- 1  
2  
3 25. Langley JM, Wang EEL, Law BJ, et al. Economic evaluation of respiratory syncytial  
4 virus infection in Canadian children: A paediatric investigators collaborative network on  
5 infections in Canada (PICNIC) study. *J Pediatr*. 1997;131(1):113-117.  
6  
7  
8 26. Patel H, Gouin S, Platt RW. Randomized, double-blind, placebo-controlled trial of  
9 oral albuterol in infants with mild-to-moderate acute viral bronchiolitis. *J Pediatr*.  
10 2003;142(5):509-514.  
11  
12 27. Kuzik BA, Al Qadhi SA, Kent S, et al. Nebulized hypertonic saline in the treatment  
13 of viral bronchiolitis in infants. *J Pediatr*. 2007;151(3):266-270. e1.  
14  
15  
16 28. Spielberger, C.D., Gorsuch, R.L., Lushene, P.R., Vagg, P.R., & Jacobs, G.A (1983).  
17 Manual for the State-Trait Anxiety Inventory. Consulting Psychologists Press, Inc  
18  
19 29. Petruzella FD, Gorelick MH. Duration of illness in infants with bronchiolitis  
20 evaluated in the emergency department. *Paediatrics*. 2010;126(2):285.  
21  
22 30. Zwarenstein M, Treweek S, Gagnier JJ, et al. Improving the reporting of pragmatic  
23 trials: An extension of the CONSORT statement. *BMJ*. 2008;337:a2390.  
24  
25  
26 31. Ware JH, Hamel MB. Pragmatic Trials – Guides to Better Care? *NEJM*. 2011.  
27 364:1685-1687.  
28  
29 32. Moineddin R, Nie JX, Domb G, Leong AM, Upshur REG. Seasonality of primary  
30 care utilization of respiratory diseases in Ontario: A time-series analysis. *BMC Health*  
31 *Serv Res*. 2008. 8:160. □  
32  
33  
34 33. Ontario Case Costing Initiative. 2015. Ontario Ministry of Health and Long-Term  
35 Care. Available at <http://www.occp.com/mainPage.htm>. □  
36  
37  
38 34. Health Data Branch Web Portal. 2015. Ontario Ministry of Health and Long-Term  
39 Care. Available at <https://hsimi.on.ca/hdbportal/>. □  
40  
41 35. Dyson MP, Shave K, Gates A, et al. Which outcomes are important to patients and  
42 families who have experienced paediatric acute respiratory illness? Findings from a  
43 mixed methods sequential exploratory study. *BMJ Open* 2017;7:e018199. doi:10.1136/  
44 *bmjopen-2017-018199*  
45

#### 46 **Authors' contributions**

47 SM conceived and designed the study and drafted the first version of the manuscript. GW  
48 conceived the study and participated in the design and manuscript revisions. PP  
49 conceived and designed the study and revised the manuscript. LG, CP, RK, AB, MR,  
50 MS, NK, KBR, ML, LP, MEM, AW, and SS participated in the design of the study and  
51 manuscript revisions. All authors read and revised the manuscript critically for important  
52 intellectual content and approved the final manuscript.  
53  
54  
55  
56  
57  
58  
59  
60

### **Funding statement**

This pilot study was funded by a peer-reviewed grant from the Paediatric Consultants Partnership, Hospital for Sick Children. It was also supported by the Paediatric Outcomes Research Team, Hospital for Sick Children, which receives funding from the SickKids Foundation, Toronto. The multicentre trial is funded by a grant from the Canadian Institutes of Health Research. Funders were not involved in any way in the design, collection, analysis, interpretation of data, writing of the manuscript, or the decision to submit the manuscript for publication.

### **Competing interests**

The authors declare that they have no competing interests.

### **Figure Legends**

Figure 1. Trial Schematic

Figure 2. Schedule of enrolment, interventions, and assessments

\*ED=emergency department

Patients who are eligible are approached once they meet clinical stability criteria during the hospitalization. This maybe on the first day of hospitalization or subsequent days. The intervention is applied until discharge and follow-up occurs after 15 days post discharge.

Figure 1. Trial Schematic

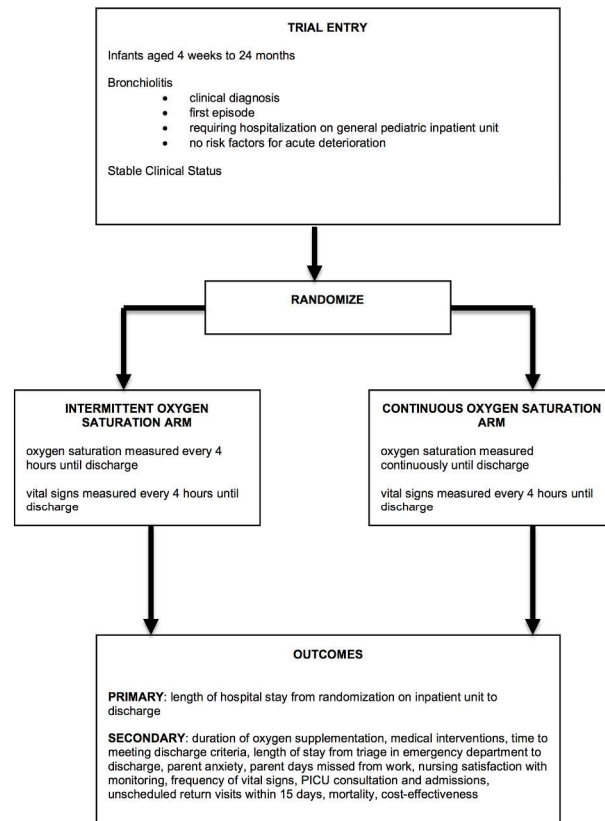

Figure 1. Trial Schematic

215x279mm (300 x 300 DPI)



Figure 2. Schedule of enrolment, interventions, and assessments

|                                                                                               | Enrolment                 | Allocation                      | Post-allocation                   |                                   |                                   |                                |                               | Close out                    |
|-----------------------------------------------------------------------------------------------|---------------------------|---------------------------------|-----------------------------------|-----------------------------------|-----------------------------------|--------------------------------|-------------------------------|------------------------------|
| TIMEPOINT**                                                                                   | <i>Hospital Admission</i> | <i>Hospital day<sub>x</sub></i> | <i>Hospital day<sub>x+1</sub></i> | <i>Hospital day<sub>x+2</sub></i> | <i>Hospital day<sub>x+y</sub></i> | <i>Discharge from hospital</i> | <i>15 days post discharge</i> | <i>Recruitment completed</i> |
| <b>ENROLMENT:</b>                                                                             |                           |                                 |                                   |                                   |                                   |                                |                               |                              |
| Eligibility screen                                                                            | X                         | X                               |                                   |                                   |                                   |                                |                               |                              |
| Informed consent                                                                              |                           | X                               |                                   |                                   |                                   |                                |                               |                              |
| Allocation                                                                                    |                           | X                               |                                   |                                   |                                   |                                |                               |                              |
| <b>INTERVENTIONS:</b>                                                                         |                           |                                 |                                   |                                   |                                   |                                |                               |                              |
| <i>Intermittent Oxygen Saturation Monitoring</i>                                              |                           | X                               | X                                 | X                                 | X                                 | X                              |                               |                              |
| <i>Continuous Oxygen Saturation Monitoring</i>                                                |                           | X                               | X                                 | X                                 | X                                 | X                              |                               |                              |
| <b>ASSESSMENTS:</b>                                                                           |                           |                                 |                                   |                                   |                                   |                                |                               |                              |
| <i>Baseline clinical and demographic data</i>                                                 | X                         | X                               |                                   |                                   |                                   |                                |                               |                              |
| <i>Primary outcome: Time (hours) from randomization to discharge from hospital</i>            |                           |                                 |                                   |                                   |                                   | X                              |                               |                              |
| <i>Secondary outcomes: duration of oxygen supplementation, medical interventions, time to</i> |                           |                                 |                                   |                                   |                                   | X                              |                               |                              |



1  
2  
3  
4  
5  
6  
7  
8  
9  
10  
11  
12  
13  
14  
15  
16  
17  
18  
19  
20  
21  
22  
23  
24  
25  
26  
27  
28  
29  
30  
31  
32  
33  
34  
35  
36  
37  
38  
39  
40  
41  
42  
43  
44  
45  
46  
47

|                                                                                                                 |   |   |   |   |   |   |   |
|-----------------------------------------------------------------------------------------------------------------|---|---|---|---|---|---|---|
| <b>meeting discharge criteria, length of hospital stay from ED, parent anxiety, PICU admission/consultation</b> |   |   |   |   |   |   |   |
| <b>Nursing satisfaction</b>                                                                                     | X | X | X | X | X |   |   |
| <b>Parent days missed from work, unscheduled return to care within 15 days of discharge, mortality</b>          |   |   |   |   |   | X |   |
| <b>Cost-effectiveness</b>                                                                                       |   |   |   |   |   |   | X |

\*ED=emergency department  
 Patients who are eligible are approached once they meet clinical stability criteria during the hospitalization. This maybe on the first day of hospitalization or subsequent days. The intervention is applied until discharge and follow-up occurs after 15 days post discharge.

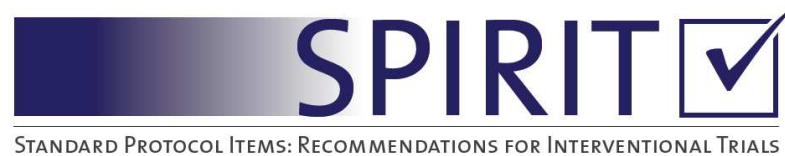

SPIRIT 2013 Checklist: Recommended items to address in a clinical trial protocol and related documents\*

| Section/item                      | Item No | Description                                                                                                                                                                                                                                                                              | Addressed on page number |
|-----------------------------------|---------|------------------------------------------------------------------------------------------------------------------------------------------------------------------------------------------------------------------------------------------------------------------------------------------|--------------------------|
| <b>Administrative information</b> |         |                                                                                                                                                                                                                                                                                          |                          |
| Title                             | 1       | Descriptive title identifying the study design, population, interventions, and, if applicable, trial acronym                                                                                                                                                                             | ___ 1 ___                |
| Trial registration                | 2a      | Trial identifier and registry name. If not yet registered, name of intended registry                                                                                                                                                                                                     | ___ 4 ___                |
|                                   | 2b      | All items from the World Health Organization Trial Registration Data Set                                                                                                                                                                                                                 | __Table 1__              |
| Protocol version                  | 3       | Date and version identifier                                                                                                                                                                                                                                                              | ___ 3 ___                |
| Funding                           | 4       | Sources and types of financial, material, and other support                                                                                                                                                                                                                              | ___ 18 ___               |
| Roles and responsibilities        | 5a      | Names, affiliations, and roles of protocol contributors                                                                                                                                                                                                                                  | ___ 1-3,18 ___           |
|                                   | 5b      | Name and contact information for the trial sponsor                                                                                                                                                                                                                                       | ___ 3 ___                |
|                                   | 5c      | Role of study sponsor and funders, if any, in study design; collection, management, analysis, and interpretation of data; writing of the report; and the decision to submit the report for publication, including whether they will have ultimate authority over any of these activities | ___ 18 ___               |
|                                   | 5d      | Composition, roles, and responsibilities of the coordinating centre, steering committee, endpoint adjudication committee, data management team, and other individuals or groups overseeing the trial, if applicable (see Item 21a for data monitoring committee)                         | ___ 13 ___               |

1  
2  
3  
4  
5  
6  
7  
8  
9  
10  
11  
12  
13  
14  
15  
16  
17  
18  
19  
20  
21  
22  
23  
24  
25  
26  
27  
28  
29  
30  
31  
32  
33  
34  
35  
36  
37  
38  
39  
40  
41  
42  
43  
44  
45  
46  
47

**Introduction**

|                          |    |                                                                                                                                                                                                           |         |
|--------------------------|----|-----------------------------------------------------------------------------------------------------------------------------------------------------------------------------------------------------------|---------|
| Background and rationale | 6a | Description of research question and justification for undertaking the trial, including summary of relevant studies (published and unpublished) examining benefits and harms for each intervention        | __6,7__ |
|                          | 6b | Explanation for choice of comparators                                                                                                                                                                     | __6,__  |
| Objectives               | 7  | Specific objectives or hypotheses                                                                                                                                                                         | __7__   |
| Trial design             | 8  | Description of trial design including type of trial (eg, parallel group, crossover, factorial, single group), allocation ratio, and framework (eg, superiority, equivalence, noninferiority, exploratory) | __7__   |

**Methods: Participants, interventions, and outcomes**

|                      |     |                                                                                                                                                                                                                                                                                                                                                                                |           |
|----------------------|-----|--------------------------------------------------------------------------------------------------------------------------------------------------------------------------------------------------------------------------------------------------------------------------------------------------------------------------------------------------------------------------------|-----------|
| Study setting        | 9   | Description of study settings (eg, community clinic, academic hospital) and list of countries where data will be collected. Reference to where list of study sites can be obtained                                                                                                                                                                                             | __8__     |
| Eligibility criteria | 10  | Inclusion and exclusion criteria for participants. If applicable, eligibility criteria for study centres and individuals who will perform the interventions (eg, surgeons, psychotherapists)                                                                                                                                                                                   | __8,9__   |
| Interventions        | 11a | Interventions for each group with sufficient detail to allow replication, including how and when they will be administered                                                                                                                                                                                                                                                     | __10__    |
|                      | 11b | Criteria for discontinuing or modifying allocated interventions for a given trial participant (eg, drug dose change in response to harms, participant request, or improving/worsening disease)                                                                                                                                                                                 | __10__    |
|                      | 11c | Strategies to improve adherence to intervention protocols, and any procedures for monitoring adherence (eg, drug tablet return, laboratory tests)                                                                                                                                                                                                                              | __10__    |
|                      | 11d | Relevant concomitant care and interventions that are permitted or prohibited during the trial                                                                                                                                                                                                                                                                                  | __10,11__ |
| Outcomes             | 12  | Primary, secondary, and other outcomes, including the specific measurement variable (eg, systolic blood pressure), analysis metric (eg, change from baseline, final value, time to event), method of aggregation (eg, median, proportion), and time point for each outcome. Explanation of the clinical relevance of chosen efficacy and harm outcomes is strongly recommended | __11,12__ |

|    |                      |    |                                                                                                                                                                                       |           |
|----|----------------------|----|---------------------------------------------------------------------------------------------------------------------------------------------------------------------------------------|-----------|
| 1  |                      |    |                                                                                                                                                                                       |           |
| 2  |                      |    |                                                                                                                                                                                       |           |
| 3  | Participant timeline | 13 | Time schedule of enrolment, interventions (including any run-ins and washouts), assessments, and visits for participants. A schematic diagram is highly recommended (see Figure)      | Figure 2  |
| 4  |                      |    |                                                                                                                                                                                       |           |
| 5  | Sample size          | 14 | Estimated number of participants needed to achieve study objectives and how it was determined, including clinical and statistical assumptions supporting any sample size calculations | __13,14__ |
| 6  |                      |    |                                                                                                                                                                                       |           |
| 7  |                      |    |                                                                                                                                                                                       |           |
| 8  | Recruitment          | 15 | Strategies for achieving adequate participant enrolment to reach target sample size                                                                                                   | __10__    |
| 9  |                      |    |                                                                                                                                                                                       |           |
| 10 |                      |    |                                                                                                                                                                                       |           |

### 11 **Methods: Assignment of interventions (for controlled trials)**

#### 12 Allocation:

|    |                                  |     |                                                                                                                                                                                                                                                                                                                                                          |        |
|----|----------------------------------|-----|----------------------------------------------------------------------------------------------------------------------------------------------------------------------------------------------------------------------------------------------------------------------------------------------------------------------------------------------------------|--------|
| 13 |                                  |     |                                                                                                                                                                                                                                                                                                                                                          |        |
| 14 |                                  |     |                                                                                                                                                                                                                                                                                                                                                          |        |
| 15 | Sequence generation              | 16a | Method of generating the allocation sequence (eg, computer-generated random numbers), and list of any factors for stratification. To reduce predictability of a random sequence, details of any planned restriction (eg, blocking) should be provided in a separate document that is unavailable to those who enrol participants or assign interventions | __12__ |
| 16 |                                  |     |                                                                                                                                                                                                                                                                                                                                                          |        |
| 17 |                                  |     |                                                                                                                                                                                                                                                                                                                                                          |        |
| 18 |                                  |     |                                                                                                                                                                                                                                                                                                                                                          |        |
| 19 |                                  |     |                                                                                                                                                                                                                                                                                                                                                          |        |
| 20 | Allocation concealment mechanism | 16b | Mechanism of implementing the allocation sequence (eg, central telephone; sequentially numbered, opaque, sealed envelopes), describing any steps to conceal the sequence until interventions are assigned                                                                                                                                                | __12__ |
| 21 |                                  |     |                                                                                                                                                                                                                                                                                                                                                          |        |
| 22 |                                  |     |                                                                                                                                                                                                                                                                                                                                                          |        |
| 23 |                                  |     |                                                                                                                                                                                                                                                                                                                                                          |        |
| 24 | Implementation                   | 16c | Who will generate the allocation sequence, who will enrol participants, and who will assign participants to interventions                                                                                                                                                                                                                                | __12__ |
| 25 |                                  |     |                                                                                                                                                                                                                                                                                                                                                          |        |
| 26 |                                  |     |                                                                                                                                                                                                                                                                                                                                                          |        |
| 27 | Blinding (masking)               | 17a | Who will be blinded after assignment to interventions (eg, trial participants, care providers, outcome assessors, data analysts), and how                                                                                                                                                                                                                | __13__ |
| 28 |                                  |     |                                                                                                                                                                                                                                                                                                                                                          |        |
| 29 |                                  |     |                                                                                                                                                                                                                                                                                                                                                          |        |
| 30 |                                  | 17b | If blinded, circumstances under which unblinding is permissible, and procedure for revealing a participant's allocated intervention during the trial                                                                                                                                                                                                     | __13__ |
| 31 |                                  |     |                                                                                                                                                                                                                                                                                                                                                          |        |
| 32 |                                  |     |                                                                                                                                                                                                                                                                                                                                                          |        |
| 33 |                                  |     |                                                                                                                                                                                                                                                                                                                                                          |        |

### 34 **Methods: Data collection, management, and analysis**

|    |                         |     |                                                                                                                                                                                                                                                                                                                                                                                                              |        |
|----|-------------------------|-----|--------------------------------------------------------------------------------------------------------------------------------------------------------------------------------------------------------------------------------------------------------------------------------------------------------------------------------------------------------------------------------------------------------------|--------|
| 35 |                         |     |                                                                                                                                                                                                                                                                                                                                                                                                              |        |
| 36 | Data collection methods | 18a | Plans for assessment and collection of outcome, baseline, and other trial data, including any related processes to promote data quality (eg, duplicate measurements, training of assessors) and a description of study instruments (eg, questionnaires, laboratory tests) along with their reliability and validity, if known. Reference to where data collection forms can be found, if not in the protocol | __13__ |
| 37 |                         |     |                                                                                                                                                                                                                                                                                                                                                                                                              |        |
| 38 |                         |     |                                                                                                                                                                                                                                                                                                                                                                                                              |        |
| 39 |                         |     |                                                                                                                                                                                                                                                                                                                                                                                                              |        |
| 40 |                         |     |                                                                                                                                                                                                                                                                                                                                                                                                              |        |
| 41 |                         |     |                                                                                                                                                                                                                                                                                                                                                                                                              |        |
| 42 |                         |     |                                                                                                                                                                                                                                                                                                                                                                                                              |        |
| 43 |                         |     |                                                                                                                                                                                                                                                                                                                                                                                                              |        |
| 44 |                         |     |                                                                                                                                                                                                                                                                                                                                                                                                              |        |
| 45 |                         |     |                                                                                                                                                                                                                                                                                                                                                                                                              |        |
| 46 |                         |     |                                                                                                                                                                                                                                                                                                                                                                                                              |        |
| 47 |                         |     |                                                                                                                                                                                                                                                                                                                                                                                                              |        |

1  
2  
3  
4  
5  
6  
7  
8  
9  
10  
11  
12  
13  
14  
15  
16  
17  
18

|                     |     |                                                                                                                                                                                                                                                                   |           |
|---------------------|-----|-------------------------------------------------------------------------------------------------------------------------------------------------------------------------------------------------------------------------------------------------------------------|-----------|
|                     | 18b | Plans to promote participant retention and complete follow-up, including list of any outcome data to be collected for participants who discontinue or deviate from intervention protocols                                                                         | __10__    |
| Data management     | 19  | Plans for data entry, coding, security, and storage, including any related processes to promote data quality (eg, double data entry; range checks for data values). Reference to where details of data management procedures can be found, if not in the protocol | __13__    |
| Statistical methods | 20a | Statistical methods for analysing primary and secondary outcomes. Reference to where other details of the statistical analysis plan can be found, if not in the protocol                                                                                          | __13,14__ |
|                     | 20b | Methods for any additional analyses (eg, subgroup and adjusted analyses)                                                                                                                                                                                          | __13,14__ |
|                     | 20c | Definition of analysis population relating to protocol non-adherence (eg, as randomised analysis), and any statistical methods to handle missing data (eg, multiple imputation)                                                                                   | __14__    |

**Methods: Monitoring**

19  
20  
21  
22  
23  
24  
25  
26  
27  
28  
29  
30  
31  
32  
33  
34  
35

|                 |     |                                                                                                                                                                                                                                                                                                                                       |           |
|-----------------|-----|---------------------------------------------------------------------------------------------------------------------------------------------------------------------------------------------------------------------------------------------------------------------------------------------------------------------------------------|-----------|
| Data monitoring | 21a | Composition of data monitoring committee (DMC); summary of its role and reporting structure; statement of whether it is independent from the sponsor and competing interests; and reference to where further details about its charter can be found, if not in the protocol. Alternatively, an explanation of why a DMC is not needed | __13__    |
|                 | 21b | Description of any interim analyses and stopping guidelines, including who will have access to these interim results and make the final decision to terminate the trial                                                                                                                                                               | __13__    |
| Harms           | 22  | Plans for collecting, assessing, reporting, and managing solicited and spontaneously reported adverse events and other unintended effects of trial interventions or trial conduct                                                                                                                                                     | __11,12__ |
| Auditing        | 23  | Frequency and procedures for auditing trial conduct, if any, and whether the process will be independent from investigators and the sponsor                                                                                                                                                                                           | __NA__    |

**Ethics and dissemination**

36  
37  
38  
39  
40  
41  
42  
43  
44  
45  
46  
47

|                          |    |                                                                                           |        |
|--------------------------|----|-------------------------------------------------------------------------------------------|--------|
| Research ethics approval | 24 | Plans for seeking research ethics committee/institutional review board (REC/IRB) approval | __15__ |
|--------------------------|----|-------------------------------------------------------------------------------------------|--------|

|    |                      |     |                                                                                                                 |                |
|----|----------------------|-----|-----------------------------------------------------------------------------------------------------------------|----------------|
| 1  |                      |     |                                                                                                                 |                |
| 2  |                      |     |                                                                                                                 |                |
| 3  | Protocol             | 25  | Plans for communicating important protocol modifications (eg, changes to eligibility criteria, outcomes,        | __15__         |
| 4  | amendments           |     | analyses) to relevant parties (eg, investigators, REC/IRBs, trial participants, trial registries, journals,     |                |
| 5  |                      |     | regulators)                                                                                                     |                |
| 6  |                      |     |                                                                                                                 |                |
| 7  | Consent or assent    | 26a | Who will obtain informed consent or assent from potential trial participants or authorised surrogates, and      | __15__         |
| 8  |                      |     | how (see Item 32)                                                                                               |                |
| 9  |                      |     |                                                                                                                 |                |
| 10 |                      | 26b | Additional consent provisions for collection and use of participant data and biological specimens in ancillary  | __NA__         |
| 11 |                      |     | studies, if applicable                                                                                          |                |
| 12 |                      |     |                                                                                                                 |                |
| 13 | Confidentiality      | 27  | How personal information about potential and enrolled participants will be collected, shared, and maintained    | __15__         |
| 14 |                      |     | in order to protect confidentiality before, during, and after the trial                                         |                |
| 15 |                      |     |                                                                                                                 |                |
| 16 | Declaration of       | 28  | Financial and other competing interests for principal investigators for the overall trial and each study site   | 18__           |
| 17 | interests            |     |                                                                                                                 |                |
| 18 |                      |     |                                                                                                                 |                |
| 19 | Access to data       | 29  | Statement of who will have access to the final trial dataset, and disclosure of contractual agreements that     | __15__         |
| 20 |                      |     | limit such access for investigators                                                                             |                |
| 21 |                      |     |                                                                                                                 |                |
| 22 | Ancillary and post-  | 30  | Provisions, if any, for ancillary and post-trial care, and for compensation to those who suffer harm from trial | __NA__         |
| 23 | trial care           |     | participation                                                                                                   |                |
| 24 |                      |     |                                                                                                                 |                |
| 25 | Dissemination policy | 31a | Plans for investigators and sponsor to communicate trial results to participants, healthcare professionals,     | __15__         |
| 26 |                      |     | the public, and other relevant groups (eg, via publication, reporting in results databases, or other data       |                |
| 27 |                      |     | sharing arrangements), including any publication restrictions                                                   |                |
| 28 |                      |     |                                                                                                                 |                |
| 29 |                      | 31b | Authorship eligibility guidelines and any intended use of professional writers                                  | __15__         |
| 30 |                      |     |                                                                                                                 |                |
| 31 |                      | 31c | Plans, if any, for granting public access to the full protocol, participant-level dataset, and statistical code | __NA__         |
| 32 |                      |     |                                                                                                                 |                |
| 33 |                      |     |                                                                                                                 |                |
| 34 | <b>Appendices</b>    |     |                                                                                                                 |                |
| 35 |                      |     |                                                                                                                 |                |
| 36 | Informed consent     | 32  | Model consent form and other related documentation given to participants and authorised surrogates              | __available on |
| 37 | materials            |     |                                                                                                                 | request__      |
| 38 |                      |     |                                                                                                                 |                |
| 39 | Biological           | 33  | Plans for collection, laboratory evaluation, and storage of biological specimens for genetic or molecular       | __NA__         |
| 40 | specimens            |     | analysis in the current trial and for future use in ancillary studies, if applicable                            | __             |
| 41 |                      |     |                                                                                                                 |                |

1  
2  
3  
4  
5  
6  
7  
8  
9  
10  
11  
12  
13  
14  
15  
16  
17  
18  
19  
20  
21  
22  
23  
24  
25  
26  
27  
28  
29  
30  
31  
32  
33  
34  
35  
36  
37  
38  
39  
40  
41  
42  
43  
44  
45  
46  
47

\*It is strongly recommended that this checklist be read in conjunction with the SPIRIT 2013 Explanation & Elaboration for important clarification on the items. Amendments to the protocol should be tracked and dated. The SPIRIT checklist is copyrighted by the SPIRIT Group under the Creative Commons "[Attribution-NonCommercial-NoDerivs 3.0 Unported](#)" license.

For peer review only

# BMJ Open

## Intermittent vs. continuous oxygen saturation monitoring for infants hospitalized with bronchiolitis: study protocol for a pragmatic randomized controlled trial

|                                 |                                                                                                                                                                                                                                                                                                                                                                                                                                                                                                                                                                                                                                                                                                                                                                                                                                                                                                                                                                                                                                                                                                                                           |
|---------------------------------|-------------------------------------------------------------------------------------------------------------------------------------------------------------------------------------------------------------------------------------------------------------------------------------------------------------------------------------------------------------------------------------------------------------------------------------------------------------------------------------------------------------------------------------------------------------------------------------------------------------------------------------------------------------------------------------------------------------------------------------------------------------------------------------------------------------------------------------------------------------------------------------------------------------------------------------------------------------------------------------------------------------------------------------------------------------------------------------------------------------------------------------------|
| Journal:                        | <i>BMJ Open</i>                                                                                                                                                                                                                                                                                                                                                                                                                                                                                                                                                                                                                                                                                                                                                                                                                                                                                                                                                                                                                                                                                                                           |
| Manuscript ID                   | bmjopen-2018-022707.R1                                                                                                                                                                                                                                                                                                                                                                                                                                                                                                                                                                                                                                                                                                                                                                                                                                                                                                                                                                                                                                                                                                                    |
| Article Type:                   | Protocol                                                                                                                                                                                                                                                                                                                                                                                                                                                                                                                                                                                                                                                                                                                                                                                                                                                                                                                                                                                                                                                                                                                                  |
| Date Submitted by the Author:   | 15-Mar-2018                                                                                                                                                                                                                                                                                                                                                                                                                                                                                                                                                                                                                                                                                                                                                                                                                                                                                                                                                                                                                                                                                                                               |
| Complete List of Authors:       | Mahant, Sanjay; The Hospital for Sick Children, Paediatrics<br>Wahi, Gita; McMaster University, Department of Health Research Methods, Evidence, and Impact; McMaster University, Department of Pediatrics<br>Giglia, Luci; McMaster University, Pediatrics<br>Pound, Catherine; University of Ottawa; Children's Hospital of Eastern Ontario<br>Kanani, Ronik; North York General Hospital, University of Toronto, Pediatrics<br>Bayliss, Ann; Trillium Health Partners, University of Toronto<br>Roy, Madan; McMaster University, Pediatrics<br>Sakran, Mahmoud; Lakeridge Health, Queens University, Pediatrics<br>Kozlowski, Natascha; Lakeridge Health<br>Breein-Reid, Karen; Hospital for Sick Children, Nursing<br>Lavigne, Mollie; Hospital for Sick Children, Quality and Risk Management<br>Premji, Laila; Hospital for Sick Children, Pediatrics<br>Moretti, Myla; The Hospital for Sick Children, University of Toronto, SickKids Research Institute<br>Willan, Andy; University of Toronto<br>Schuh, Suzanne; Hospital for Sick Children, Pediatrics<br>Parkin, Patricia; The Hospital for Sick Children, Pediatric Medicine |
| <b>Primary Subject Heading</b>: | Paediatrics                                                                                                                                                                                                                                                                                                                                                                                                                                                                                                                                                                                                                                                                                                                                                                                                                                                                                                                                                                                                                                                                                                                               |
| Secondary Subject Heading:      | Evidence based practice, Paediatrics, Medical management                                                                                                                                                                                                                                                                                                                                                                                                                                                                                                                                                                                                                                                                                                                                                                                                                                                                                                                                                                                                                                                                                  |
| Keywords:                       | bronchiolitis, pulse oximetry, randomized controlled trial                                                                                                                                                                                                                                                                                                                                                                                                                                                                                                                                                                                                                                                                                                                                                                                                                                                                                                                                                                                                                                                                                |
|                                 |                                                                                                                                                                                                                                                                                                                                                                                                                                                                                                                                                                                                                                                                                                                                                                                                                                                                                                                                                                                                                                                                                                                                           |

SCHOLARONE™  
Manuscripts



1  
2  
3 **Intermittent vs. continuous oxygen saturation monitoring for infants hospitalized**  
4 **with bronchiolitis: study protocol for a pragmatic randomized controlled trial**  
5

6 Mahant S, Wahi G, Giglia L, Pound C, Kanani R, Bayliss A, Roy M, Sakran M,  
7 Kozlowski N, Breen-Reid K, Lavigne M, Premji L, Moretti ME, Willan A, Schuh S,  
8 Parkin PC  
9

10  
11 Sanjay Mahant MD FRCPC MSc  
12 Associate Professor  
13 Division of Paediatric Medicine, Paediatric Outcomes Research Team (PORT),  
14 Department of Paediatrics and Institute of Health Policy, Management and Evaluation,  
15 University of Toronto; Research Institute, Hospital for Sick Children  
16 555 University Avenue, Toronto, Ontario, Canada  
17 M5G1X8  
18 Email: [sanjay.mahant@sickkids.ca](mailto:sanjay.mahant@sickkids.ca)  
19  
20

21  
22 Gita Wahi MD FRCPC MSc  
23 Assistant Professor  
24 Department of Paediatrics, McMaster University  
25 Hamilton Health Sciences Centre, HSC-3A78  
26 1280 Main Street West  
27 Hamilton, Ontario L8S 4K1  
28 Email: [wahig@mcmaster.ca](mailto:wahig@mcmaster.ca)  
29

30  
31 Luci Giglia MD FRCPC MSc  
32 Associate Professor  
33 Department of Paediatrics, McMaster University  
34 Hamilton Health Sciences Centre, HSC-3N27  
35 1280 Main Street West  
36 Hamilton, Ontario L8S 4K1  
37 Email: [gigliat@mcmaster.ca](mailto:gigliat@mcmaster.ca)  
38  
39

40  
41 Catherine Pound MD FRCPC MSc  
42 Assistant Professor  
43 Department of Paediatrics, University of Ottawa  
44 Children's Hospital of Eastern Ontario  
45 401 Smyth Rd, Ottawa, ON K1H 8L1  
46 Email: [cpound@cheo.on.ca](mailto:cpound@cheo.on.ca)  
47

48  
49 Ronik Kanani MD FRCPC  
50 Assistant Professor, Department of Paediatrics, University of Toronto  
51 North York General Hospital  
52 Email: [ronik.kanani@nygh.on.ca](mailto:ronik.kanani@nygh.on.ca)  
53

54  
55 Ann Bayliss MD FRCPC  
56 Department of Paediatrics, Trillium Health Partners, University of Toronto  
57  
58  
59

1  
2  
3 2200 Eglinton Avenue West  
4 Mississauga, Ontario L5M 2N1  
5 Email: [ann.bayliss@thp.ca](mailto:ann.bayliss@thp.ca)  
6

7  
8 Madan Roy  
9 Associate Professor  
10 Department of Paediatrics, McMaster University  
11 Hamilton Health Sciences Centre, Room 3N11  
12 1280 Main Street West  
13 Hamilton, Ontario L8S 4K1  
14 Email: [roym@mcmaster.ca](mailto:roym@mcmaster.ca)  
15

16  
17 Mahmoud Sakran MD  
18 Assistant Professor, Queens University  
19 Lakeridge Health  
20 Oshawa, Ontario  
21 Email: [msakran@lakeridgehealth.on.ca](mailto:msakran@lakeridgehealth.on.ca)  
22

23  
24 Natascha Kozlowski, MPH  
25 Director, Research  
26 Lakeridge Health  
27 Oshawa, Ontario  
28 Email: [nakozlowski@lakeridgehealth.on.ca](mailto:nakozlowski@lakeridgehealth.on.ca)  
29

30  
31 Karen Breen-Reid, MSN  
32 Manager, Interprofessional Education, Learning Institute  
33 Hospital for Sick Children,  
34 Adjunct Lecturer, Lawrence Bloomberg Faculty of Nursing, University of Toronto  
35 555 University Avenue, Toronto, Ontario  
36 M5G1X8  
37 Email: [Karen.breen-reid@sickkids.ca](mailto:Karen.breen-reid@sickkids.ca)  
38

39  
40 Mollie Lavigne, MSN, NP-Paediatrics  
41 Adjunct Lecturer, Lawrence S. Bloomberg Faculty of Nursing, University of Toronto  
42 The Hospital for Sick Children  
43 555 University Avenue  
44 Toronto, Ontario M5G1X8  
45 [Mollie.lavigne@sickkids.ca](mailto:Mollie.lavigne@sickkids.ca)  
46

47  
48 Laila Premji, MD FRCPC  
49 Division of Paediatric Medicine  
50 Hospital for Sick Children  
51 555 University Avenue, Toronto, Ontario  
52 M5G1X8  
53 Email: [laila.premji@sickkids.ca](mailto:laila.premji@sickkids.ca)  
54  
55  
56  
57  
58  
59

1  
2  
3 Myla E. Morretti, PhD  
4 Health Economist,  
5 Clinical Trials Unit-Ontario Child Health Support Unit  
6 The Hospital for Sick Children  
7 555 University Avenue, Toronto, Ontario  
8 M5G1X8  
9 Email: [myla.moretti@sickkids.ca](mailto:myla.moretti@sickkids.ca)  
10  
11

12 Andy R. Willan, PhD  
13 Professor of Biostatistics  
14 Dalla Lana School of Public Health  
15 Ontario Child Health Support Unit  
16 Research Institute, Hospital for Sick Children  
17 555 University Avenue, Toronto, Ontario  
18 M5G1X8  
19 Email: [andy@andywillan.com](mailto:andy@andywillan.com)  
20  
21

22 Suzanne Schuh MD FRCPC  
23 Professor  
24 Division of Emergency Medicine, Department of Paediatrics, University of Toronto  
25 Research Institute, Hospital for Sick Children  
26 555 University Avenue, Toronto, Ontario  
27 M5G1X8  
28 Email: [suzanne.schuh@sickkids.ca](mailto:suzanne.schuh@sickkids.ca)  
29  
30

31 Patricia C. Parkin MD FRCPC  
32 Professor  
33 Division of Paediatric Medicine, Paediatric Outcomes Research Team (PORT),  
34 Department of Paediatrics and Institute of Health Policy, Management and Evaluation,  
35 University of Toronto; Research Institute, Hospital for Sick Children  
36 555 University Avenue, Toronto, Ontario  
37 M5G1X8  
38 Email: [patricia.parkin@sickkids.ca](mailto:patricia.parkin@sickkids.ca)  
39  
40  
41  
42

43 Corresponding Author:

44  
45 Sanjay Mahant, MD FRCPC MSc  
46 Hospital for Sick Children  
47 555 University Avenue, Toronto, Ontario, Canada  
48 M5G1X8  
49 Email: [sanjay.mahant@sickkids.ca](mailto:sanjay.mahant@sickkids.ca)  
50 Mobile: 416.846.1602  
51 Office: 416.813.5280  
52  
53  
54  
55  
56  
57  
58  
59  
60

1  
2  
3 Keywords: bronchiolitis; pulse oximetry; randomized controlled trial; pragmatic trial;  
4 length of stay; safety; cost  
5

6  
7 Protocol Version date: March 7, 2017  
8

9 Word Count: 4,257  
10  
11  
12  
13  
14  
15  
16  
17  
18  
19  
20  
21  
22  
23  
24  
25  
26  
27  
28  
29  
30  
31  
32  
33  
34  
35  
36  
37  
38  
39  
40  
41  
42  
43  
44  
45  
46  
47  
48  
49  
50  
51  
52  
53  
54  
55  
56  
57  
58  
59  
60

For peer review only

## ABSTRACT

**Introduction:** Bronchiolitis is the most common reason for hospitalization in infants in developed countries. The main focus of hospital care is on supportive care, such as monitoring for hypoxia and supplemental oxygen administration, as active therapies lack effectiveness. Pulse oximetry is used to monitor hypoxia in hospitalized infants and is used either intermittently or continuously. Observational studies have suggested that continuous pulse oximetry use leads to a longer length of hospital stay in stable infants. The use of continuous pulse oximetry may lead to unnecessary clinical intervention due to readings that are of little clinical significance, false positive readings and less reliance on the clinical status. There is a lack of high quality evidence to guide which pulse oximetry monitoring strategy, intermittent or continuous, is superior in infants hospitalized with bronchiolitis with respect to patient and policy-relevant outcomes.

**Methods and analysis:** This is a multi-centre, pragmatic randomized controlled trial comparing two strategies for pulse oximetry monitoring in infants hospitalized for bronchiolitis. Infants aged 1 month to 2 years presenting to Canadian tertiary and community hospitals will be randomized after stabilization to receive either intermittent or continuous oxygen saturation monitoring on the inpatient unit until discharge. The primary outcome is length of hospital stay. Secondary outcomes include additional measures of effectiveness, acceptability, safety and cost. We will need to enroll 210 infants in order to detect a 12-hour difference in length of stay with a type 1 error rate of 5% and a power of 90%.

**Ethics and dissemination:** Research ethics approval has been obtained for this trial. This trial will provide data to guide hospitals and clinicians on the optimal pulse oximetry monitoring strategy in infants hospitalized with bronchiolitis. We will disseminate the findings of this study through peer reviewed publication, professional societies and meetings.

### Trial Registration

Clinicaltrials.gov: NCT02947204

### Keywords

Bronchiolitis, pulse oximetry, randomized controlled trial

### Strengths and limitations of this study

- This pragmatic trial is addressing how to best use pulse oximetry for bronchiolitis, a common hospital condition in children
- The trial is recruiting patients in both community and specialized children's hospitals and measuring outcomes relevant to patients, clinicians and the health system so that the finds are meaningful to the real-world setting
- Clinicians and patients are not blinded to the interventions as we are interested in knowing if knowledge of the treatment arm affects behavior and management decisions.

## List of Abbreviations

RCT: randomized controlled trial

GPIU: general paediatric inpatient unit

PICU: paediatric intensive care unit

ED: emergency department

AAP: American Academy of Paediatrics

CPG: clinical practice guideline

VAS: visual analogue scale

CCRT: critical care response team

RA: research assistant

## INTRODUCTION

Bronchiolitis is the most common acute lower respiratory tract infection that affects infants and young children less than 2 years of age.<sup>1,2</sup> It presents with a viral upper respiratory prodrome followed by tachypnea, chest retractions, and diffuse crackles, wheeze, or both. It is a leading cause of infant hospitalization and is cumulatively expensive for the health care system.<sup>3,4</sup> Although the illness is self-limited, some infants require hospitalization for fast and labored breathing, hypoxia, and feeding difficulties. Systematic reviews of a large body of evidence have shown minimal effectiveness for a range of active medical treatments, specifically drug therapies including steroids and inhaled bronchodilators.<sup>5-9</sup> Thus, the focus of inpatient management is on supportive care, which includes monitoring vital signs, oxygen supplementation for hypoxia, and nutritional and/or fluid supplementation.

Over the past two decades noninvasive oxygen saturation ( $S_pO_2$ ) monitoring, or pulse oximetry, has been widely available for identifying hypoxia.<sup>10</sup> Pulse oximetry can be used intermittently, such as every 4 hours, or continuously in hospitalized infants with bronchiolitis. Although pulse oximetry was introduced into bronchiolitis hospital management without health technology assessment, it has become common clinical practice to utilize continuous oxygen saturation monitoring at many centres.

Observational studies have suggested that the use of continuous oxygen saturation monitoring in stable hospitalized infants with bronchiolitis may actually unnecessarily prolong hospital stay.<sup>11-13</sup> It has been proposed that continuous monitoring leads to “over monitoring” in stable infants. This leads to greater false positive readings, clinicians reacting to low readings that are not clinically important and less reliance on the clinical status of the infant in decision-making around management and disposition. This then results in a longer duration of oxygen supplementation and/or prolonged observation in hospital. A randomized controlled trial conducted in the emergency department demonstrated clinician overreliance on oxygen saturation monitoring in the management of infants with bronchiolitis.<sup>14</sup> Experts concluded, “the art of medicine and clinical assessment should not be trumped by overreliance on a single physiologic parameter”.<sup>15</sup>

Current clinical practice guidelines from the American Academy of Paediatrics (AAP) have recommended that clinicians “may not choose to use continuous pulse oximetry or administer supplemental oxygen if the saturation exceeds 90%”.<sup>1</sup> Their recommendations are graded as evidence level D (expert opinion, case reports, reasoning from first principles). Subsequent to the guideline publication, the first trial comparing intermittent vs. continuous pulse oximetry monitoring was reported.<sup>16</sup> All infants were randomized upon admission to hospital. Infants randomized to intermittent monitoring were switched after the infants were non-hypoxemic. Length of stay was measured from the time of admission (not from the time of implementation of the intervention) and did not differ based on the oxygen saturation monitoring strategy (48.9 hours for continuous monitoring vs. 46.2 hours for intermittent monitoring;  $P=0.77$ ). Some limitations of this trial include: only inclusion of non-hypoxemic infants for intermittent monitoring;

1  
2  
3 powered to detect only an 18-hour difference in LOS (i.e. underpowered); and initiating  
4 measurement of the primary and some secondary outcomes before implementation of the  
5 monitoring intervention. An expert commentary highlighted the need for further trials.<sup>17</sup>  
6  
7

8 Two broad concerns around health care delivery have emerged that make this trial  
9 especially relevant. One is a concern of the widespread overuse of physiologic  
10 monitoring devices and alarms in hospital care, the resulting alarm fatigue of staff, and  
11 the potential to compromise patient safety.<sup>18, 19, 20</sup> Second is a concern around  
12 overdiagnosis, the detection of an abnormality that does not benefit the patient, and how  
13 it may be harming children.<sup>21</sup> A recent review on overdiagnosis highlighted the detection  
14 of clinically insignificant desaturations using continuous oxygen monitoring in  
15 bronchiolitis as an example of overdiagnosis in children.<sup>21</sup> Given these broad concerns  
16 around overuse of physiologic monitoring and the evidence gap around the most effective  
17 oxygen monitoring strategy for such a common condition as bronchiolitis, high quality  
18 evidence is needed to guide best practices and healthy policy.  
19  
20

## 21 **METHODS**

### 22 **Trial design**

23  
24  
25  
26 This is a six centre, pragmatic randomized controlled superiority trial designed with two  
27 parallel groups with a 1:1 allocation ratio with enrollment occurring over bronchiolitis  
28 seasons (each season from November to May) (see Figure 1 for trial schemata). Trial  
29 recruitment commenced November 2016. This protocol follows SPIRIT guidelines (see  
30 Figure 2 for schedule of enrollment, interventions, and assessment).<sup>22</sup>  
31  
32

#### 33 *Rationale for choice of methods*

34 *Pragmatic* randomized trials seek to answer the question “Does this intervention work  
35 under usual conditions?” and guides trial design decisions in 10 domains.<sup>23</sup> A pragmatic  
36 design will strengthen the generalizability and relevance of the study findings to the  
37 practice setting for which it is intended. We will include patients from both tertiary and  
38 community hospital settings; medical management will be consistent with usual clinical  
39 care; and we will be measuring outcomes that are important to patients and health care  
40 decision makers including cost. This study is embedded within the environment of the  
41 knowledge users who will promote uptake of the intervention and study findings; a study  
42 conducted in several settings of different types (community regional hospital as well as  
43 free-standing children’s hospital) over more than one bronchiolitis season will also  
44 enhance generalizability and knowledge transfer.  
45  
46  
47

48 A pilot study was conducted at one site (The Hospital for Sick Children, Toronto;  
49 clinicaltrials.gov NCT01646606). The pilot study demonstrated feasibility of the trial  
50 processes (i.e. number of eligible subjects, recruitment rate, inclusion/exclusion  
51 procedures, the acceptability of the intervention and willingness to randomize for  
52 clinicians, adherence to interventions, rates of completion of follow-up data) and  
53 provided data for sample size determination for this multi-centre trial.  
54  
55  
56  
57  
58  
59  
60



## Study Setting

This study will occur at three Ontario children's hospitals [The Hospital for Sick Children, Toronto (SickKids), McMaster Children's Hospital, Hamilton, and Children's Hospital of Eastern Ontario (CHEO)] and three Ontario community paediatric centre (Trillium Health Partners, Mississauga, North York General Hospital, Toronto, and Lakeridge Health) on the General Paediatric Inpatient Units (GPIU). Children with bronchiolitis are admitted to the GPIU following initial stabilization and will be eligible for the study. Children with severe bronchiolitis are admitted to the Paediatric Intensive Care Unit (PICU) and will not be eligible for the study.

## Eligibility criteria

Our eligibility criteria reflects our intention of only including infants who are in a stable phase of their hospitalization and not at higher risk of deterioration.

### *Inclusion criteria*

- Age: 4 weeks to 24 months old. Infants less than 4 weeks are at high risk for requiring care in the PICU; infants greater than 24 months do not meet the standard definitions for bronchiolitis.
- First episode of acute bronchiolitis. Infants with recurrent episodes may have an alternate diagnosis such as asthma.
- Clinical diagnosis of bronchiolitis by the attending physician as a constellation of clinical findings on history and physical exam; clinical findings include: a preceding viral upper respiratory infection, presence of wheeze on chest auscultation, and increased respiratory rate.<sup>1</sup>
- Stable Clinical Status:
  - For infants receiving oxygen, clinical status must be stable for 6 hours on the GPIU as defined by all: Stable or decreasing requirement for supplemental oxygen AND a stable or decreasing respiratory rate on at least two measurements; Respiratory rate <70 breaths/minute; Heart Rate <180 beats/minute; Oxygen supplementation <40% FiO<sub>2</sub> or <2 L/min by nasal prongs; not on heated high flow oxygen at time of enrollment.
  - For infants in room air (i.e. no supplemental oxygen), clinical status must be stable (as defined above) for 6 hours and can be assessed from the first vital signs measured in the emergency department.

### *Exclusion criteria*

The exclusion criteria are based on known risk factors for acute clinical deterioration:

- chronic medical condition: congenital heart disease that is cyanotic, hemodynamically significant requiring diuretics, and/or with pulmonary hypertension; chronic lung disease with home oxygen requirement and/or pulmonary hypertension; neuromuscular disease; immunodeficiency; hemoglobinopathy

- premature birth (<35weeks)
  - history of apnea
  - weight < 4kg
  - receiving morphine infusions
- patient on heated high flow oxygen at time of enrollment
  - ICU admission on current admission requiring mechanical or non-invasive ventilation

### **Recruitment Strategy and Baseline Measurements**

Research Assistants (RA) will assess children for eligibility 5 days a week (Monday to Friday) between 0800 and 1800. Recruitment on Saturday and Sunday is permitted if feasible. We will implement the intervention during daytime hours to simulate anticipated practice. Baseline characteristics and covariates, including those known to be associated with the length of stay will be collected prior to randomization: age, sex, history of atopy, parental cigarette smoking, treatments prior to randomization (antibiotics, salbutamol, nebulized epinephrine, steroids, intravenous fluids, nasogastric feeds), feeding adequacy, oxygen supplementation and respiratory rate at time of randomization, and duration from hospital admission to randomization.

### **Interventions**

The target oxygen saturation for oxygen supplementation will be the same for both groups at sites - 90%. Sites that also permit an acceptable oxygen saturation of greater than or equal to 88% while children are asleep (as indicated in their bronchiolitis CPG, order sets, or usual practice) will continue with that practice, in keeping with a pragmatic trial. The target oxygen saturations are based on recommendations from local CPGs, society guidelines and a trial.<sup>1,24</sup> Nurses will measure vital signs every 4 hours.

#### *Intermittent oxygen saturation monitoring group*

Oxygen saturation and vital signs will be measured intermittently at a frequency of every 4 hours by the bedside nurse through the child's hospital stay until discharge. Weaning of oxygen (i.e. when to wean oxygen and by how much) is at the discretion of the attending physicians and nurses and will occur at the 4-hourly time interval. Weaning oxygen more frequently than at the 4-hour usual spot check is permitted. Nurses can perform an additional spot check following the oxygen wean.

#### *Continuous oxygen saturation monitoring group*

Oxygen saturation will be measured continuously through the child's hospital stay until discharge. Weaning of oxygen will be as usual practice and will be left to the discretion of the attending physicians and nurses.

#### *Criteria and Procedures for discontinuing or modifying allocated intervention*

1  
2  
3 In our pilot RCT, no modifications to the allocated intervention occurred. However, the  
4 following criteria will be available for converting the group allocation of intermittent  
5 monitoring to continuous monitoring: severe tachypnea, tachycardia, apnea, and clinical  
6 deterioration as assessed by the attending medical team. The infant will be converted  
7 back to intermittent monitoring when deemed clinically stable by the attending medical  
8 team.  
9

### 10 11 *Strategies to improve adherence*

12 A multi-faceted approach will be taken to support implementation of the trial and  
13 adherence to the allocated arms. Leadership support for the trial will be obtained from  
14 nursing and physician leaders and communicated to the clinical staff. Tailored education  
15 for nurses and physicians, including resident physicians, will occur before and during the  
16 trial using a variety of methods (e.g. small group sessions, distribution of reference  
17 material including pocket cards). Key local opinion leaders for nurses and physicians  
18 were engaged in the trial concept and design and will provide support at sessions.  
19 Research assistants and nurse educators will provide one-on-one support for nurses and  
20 physicians participating in the trial.  
21  
22

### 23 24 *Concomitant care*

25 In keeping with a pragmatic trial design, all infants will receive standard care for  
26 bronchiolitis. A care map has been adapted from the site clinical practice guidelines  
27 (CPG) and order sets which were based on the AAP guidelines and recent systematic  
28 reviews.  
29

## 30 31 **Outcomes**

32  
33 Study outcomes include measures of effectiveness, acceptability of the interventions,  
34 safety, and cost.  
35

### 36 37 *Primary outcome*

38 **Length of Hospital Stay from randomization on the inpatient unit to discharge from**  
39 **hospital (hours).** Length of hospital stay was chosen as the primary outcome as it  
40 represents a clinically meaningful outcome in the context of this acute illness for families  
41 and clinicians.<sup>2</sup> It is important to hospital administrators and the health care system as  
42 hospital stay accounts for a major portion of the large costs associated with  
43 bronchiolitis.<sup>25</sup> It has also been used as the primary outcome in other trials in inpatient  
44 management of bronchiolitis.<sup>16,26,27</sup>  
45

### 46 47 *Secondary outcomes*

48 **Duration of oxygen supplementation from randomization to discontinuation of**  
49 **supplementation (hours)** will be measured from the medical record.  
50

51 **Medical interventions:** performed from time of randomization to discharge: (a) Chest x-  
52 ray (yes/no) (b) Number of blood samples drawn and blood tests (c) Nasopharyngeal tests  
53 for viruses (yes/no) (d) Blood culture (yes/no) (e) Number of bronchodilator treatments  
54 used (f) steroid administration (yes/no) (g) Number of times the nasal passage (or deeper)  
55  
56  
57  
58  
59

1  
2  
3 was suctioned (h) IV fluids initiated (yes/no) and duration (i) nasogastric feeds initiated  
4 (yes/no) and duration  
5

6  
7 **Time from randomization to meeting discharge criteria (hours):** This will be assessed  
8 twice daily (9 am and 4pm) by a RA and defined as: no fever (temperature  $<38^{\circ}\text{C}$ ), no  
9 supplemental oxygen, normal respiratory rate for age [using the World Health  
10 Organization age-specific criteria ( $<50$  breaths/min for 2-12 months,  $<40$  breaths/min for  
11 1 to 5 years)], and adequate feeding [defined as a feeding adequacy score of  $\geq 7$  on a 10  
12 cm visual analogue scale (VAS) feeding adequacy scale].  
13

14  
15 **Length of Hospital Stay from triage in the emergency department:** This will be  
16 defined as the length of time (measured in hours) from triage in the emergency  
17 department to discharge from hospital. This has been chosen as a secondary outcome and  
18 not a primary outcome as the length of time from triage to transfer to the GPIU will not  
19 be influenced by the intervention.  
20

21  
22 **Parent anxiety:** Parents will be asked to rate their level of anxiety at the current time  
23 (state anxiety) and generally (trait anxiety) every 24 hours, using two questions  
24 abstracted from the adult State Trait Anxiety Inventory<sup>28</sup>: “I feel at ease” (state, right  
25 now); “I am a steady person (trait, generally). Response options are: not at all (1);  
26 somewhat (2); moderately so (3); very much so (4).  
27

28  
29 **Number of parent work days missed from randomization to 15 days after discharge:**  
30 The RA will conduct telephone follow-up with the parent.  
31

32 **Nursing satisfaction:** The attending nurse will be asked to complete a 10 mm visual  
33 analogue scale (VAS) to measure their satisfaction with the quality of monitoring for  
34 each participant twice daily (one by the day nurse and one by the night nurse).  
35

### 36 **PICU admission and consultation after randomization.**

37

38  
39 **Unscheduled return to care within 15 days of discharge:** Parents will be phoned after  
40 discharge to record the number of unscheduled visits to an emergency department,  
41 physician’s office, or admission to hospital within 15 days of discharge. Fifteen days  
42 after discharge represents approximately 23 days from onset of symptoms and will  
43 capture the range of duration of symptoms for bronchiolitis.<sup>29</sup> The electronic medical  
44 record will also be reviewed to determine any emergency department visits and any  
45 admissions to hospital and the reasons for the visit.  
46  
47

48 **Mortality:** We will include mortality from any cause during the hospitalization and up to  
49 15 days from discharge.  
50

51 **Cost-Effectiveness:** We will perform a cost-effectiveness analysis (CEA) to determine  
52 the incremental costs (or savings) of intermittent compared to continuous oxygen  
53 saturation monitoring per change in hospital length of stay (in hours). We will take both a  
54 health care system and societal perspective. As there is no anticipated difference in long-  
55  
56  
57  
58  
59

1  
2  
3 term clinical outcomes from this condition or the intervention, our time horizon will be  
4 from admission to 15 days post discharge.<sup>29</sup> All costs, parameter estimates and ranges  
5 will be derived from study data. Standardized methods for the conduct of health  
6 economic evaluations will be followed.  
7

8  
9 **Adherence to assigned intervention group:** Adherence rate (proportion) and reasons for  
10 modifications will be reported for each group.  
11

## 12 **Assignment of Interventions**

### 13 *Allocation*

14  
15 The allocation sequence will be generated using computer-generated random numbers by  
16 the trial biostatistician. Randomization will be stratified by centre. An allocation ratio of  
17 1:1 with random permuted blocks of varying size will be used within centre. Allocation  
18 concealment will be achieved by using a central randomization system using the REDCap  
19 randomization module. The site RA will confirm eligibility and obtain consent; then they  
20 will obtain the participant group assignment through the REDCap application.  
21  
22

### 23 *Blinding*

24  
25 Statisticians and investigators will be blind to the group allocation during the data  
26 analysis. Parents, attending nurses, physicians and research personnel involved with data  
27 collection will not be blinded to the group allocation. It is important that the clinicians  
28 receive the allocated monitoring strategy with fidelity (e.g. are aware that monitoring is  
29 intermittent and that they will not receive saturation readings more frequently) as we are  
30 interested in determining if the oxygen monitoring strategy affects their behaviour and  
31 management decisions. By taking this pragmatic approach, our estimates of effectiveness  
32 will be more applicable to usual care settings.<sup>30,31</sup>  
33  
34

## 35 **Data Collection Methods**

36  
37 The RAs will be embedded in each inpatient unit and will collect data.  
38  
39

### 40 *Health Service Utilization and Cost Data*

41  
42 At the end of the trial, decision support at each of the study sites will provide individual  
43 case-costing for each participant's hospitalization for the index admission. Direct out-of-  
44 pocket costs of caregivers/parents and productivity losses will be obtained directly from  
45 caregivers. A custom data collection form has been developed to measure these costs and  
46 losses upon discharge. It will be administered to participants in both arms of the trial and  
47 can be self-administered or collected via interview with the RA. Any additional health  
48 care utilization, out-of-pocket expenses and productivity losses incurred in the 15 days  
49 after discharge will be obtained by the RA at the follow up call.  
50

## 51 **Data Management**

1  
2  
3 The Ontario Child Health Support Unit at SickKids and CHEO (oschu.ca) will serve as  
4 the trials and data management centre. REDCap software will be used for data  
5 management.  
6

## 7 **Data Monitoring**

8  
9  
10 A Data Monitoring Committee was deemed not to be necessary by research ethics board  
11 (REB). There will be no interim analysis or plans for early trial termination.  
12

## 13 **Statistical Methods**

### 14 *Sample size*

15  
16 **Sample size and recruitment duration:** The primary outcome is length of hospital stay  
17 from time of randomization on the GPIU to discharge. Assuming a median length of  
18 hospital stay from randomization to discharge of 36 hours (from pilot data, published  
19 trials), a type 1 error rate of 0.05 (2 sided), power (1- $\beta$ ) of 90%, 105 subjects per group is  
20 needed to detect a clinically significant difference of 12 hours. There will be no  
21 adjustment due to loss to follow-up as this outcome is assessed in hospital. We believe  
22 that a 12-hour difference between treatment groups is a clinically meaningful difference,  
23 based on consensus with our research team, hospital administrators, and clinical experts.  
24

25  
26 Based on administrative data there are approximately 415 bronchiolitis  
27 admissions per year in total at the 6 sites. Approximately 40% will not meet the eligibility  
28 criteria and of these 30% will not be recruited due to off-season presentation (May to  
29 November) or missed, leaving 174 admissions. Assuming a conservative recruitment rate  
30 of 70% (based on pilot study), we expect approximately 120 recruited patients per  
31 season. Thus, two 6-month seasons, each from mid-November to mid-May, will be  
32 needed to recruit the 210 subjects. This seasonal definition of November to May will  
33 capture the peak months of respiratory viral infections responsible for bronchiolitis.<sup>32</sup>  
34  
35

### 36 *Statistical Analysis*

37  
38 **Primary Outcome:** Data will be analyzed according to intention to treat principles for the  
39 primary outcome. Given that the primary and most secondary outcomes are obtained  
40 during hospitalization, and mortality is rare, it is anticipated that there will be no missing  
41 data. For the outcomes measured after discharge (readmissions and parental work days  
42 missed), outcomes with the available data and lost to follow will be reported.  
43

44  
45 The primary outcome, length of hospital stay (hours) from randomization on the  
46 inpatient unit to discharge, will be described as the ratio of the two medians with the 95%  
47 confidence intervals. Kaplan-Meier-type survival curves will be graphed for both  
48 treatment arms. Since no censoring is anticipated, the arms will be compared using a  
49 Wilcoxon rank-sum test. Since each site will follow one of two oxygen saturation targets  
50 for all their patients, as per their usual practice ( $\geq 90\%$  awake and asleep *OR*  $\geq 90\%$   
51 awake and 88% asleep), a treatment by target interaction will be tested to see if the  
52 treatment effect differs between targets.  
53  
54  
55  
56  
57  
58  
59



1  
2  
3 **Secondary outcomes:** To control for multiple testing, the statistical level for significance  
4 for the secondary outcomes will be set to 0.005, two-sided. For the time-to-event  
5 outcomes (oxygen supplementation, discharge criteria) a Wilcoxon rank-sum test will be  
6 applied. For count data (interventions) a Poisson model will be applied. For continuous  
7 data (parent anxiety, nursing satisfaction) a normal model for repeated observations will  
8 be applied. For binary data (PICU admission, unscheduled readmission, mortality,  
9 adherence) a Fisher exact test will be applied.  
10  
11

12 **Cost-effectiveness analysis:** For the cost-effective analysis costs will be adjusted for  
13 inflation and reported in Canadian dollars. Cost-effectiveness will be expressed as an  
14 incremental cost-effectiveness ratio (ICER), calculated by dividing the incremental costs  
15 between intermittent and continuous oxygen saturation monitoring by the incremental  
16 difference in hospital length of stay.<sup>33,34</sup> Extensive sensitivity analyses will be performed  
17 to evaluate the robustness of the results and evaluate uncertainty in assumptions.  
18 Deterministic one-way sensitivity analysis will be performed with all variables using  
19 ranges obtained from the 95% confidence intervals generated directly from study data.  
20 Probabilistic sensitivity analysis will also be performed to establish a point estimate and  
21 95% confidence interval around the ICER.  
22  
23  
24

## 25 **Patient and Public Involvement**

26  
27 Patients and the public were not directly involved in the development of the study (i.e.  
28 research question, outcomes choice, study design, recruitment, assessment of burden of  
29 interventions). Outcomes chosen include those reported as a priority to patients as noted  
30 in the literature.<sup>2,35</sup> Furthermore, we conducted a pilot study to ensure that trial processes  
31 were feasible and acceptable from a patient perspective. Study results will be  
32 disseminated to the public through social media.  
33  
34

## 35 **Ethical and dissemination**

36  
37 We received approval from the Research Ethics Board at all sites. Written informed  
38 consent will be obtained from each participant by the site research staff. Identifiable  
39 personal health information will not be uploaded to the REDCap database. Protocol  
40 amendments will be approved by Research Ethics Boards prior to implementation of  
41 protocol changes. All study investigators will have access to the final trial dataset. The  
42 International Committee of Medical Journal Editors authorship eligibility guidelines will  
43 be used for publications. End of study dissemination activities will be conducted locally  
44 to clinical groups and incorporated into site CPGs; findings will be presented through  
45 webinars and society meetings (e.g. the Paediatric Academic Society, AAP Paediatric  
46 Hospital Medicine meetings, Canadian Paediatric Society), and through social media. We  
47 anticipate publication of findings in a general medical or paediatric journal. We will work  
48 with knowledge users to incorporate the study findings into professional society practice  
49 guidelines.  
50  
51  
52

## 53 **DISCUSSION**

1  
2  
3 Bronchiolitis is one of the most common reasons for hospitalization in infants in the  
4 developed world and accounts for significant health care costs. The use of pulse oximetry  
5 has become common practice in hospitalized infants, however there is no RCT evidence  
6 on how to best use this technology in this practice context. The overall goal of our  
7 pragmatic RCT is to determine whether intermittent vs. continuous pulse oximetry results  
8 in a shorter length of hospital stay in infants with a stable clinical status hospitalized with  
9 bronchiolitis. Secondary outcomes include nursing satisfaction with monitoring, parental  
10 anxiety and days missed from work, and outcomes related to safety (intensive care unit  
11 consultation and admission, revisits after discharge, and mortality).  
12  
13

14  
15 Several aspects of this trial are important to highlight. First, our inclusion criteria were  
16 specifically designed to include infants who are in the stable phase of their illness during  
17 hospitalization and exclude infants at higher risk of deterioration. We took this  
18 conservative approach to maximize safety and promote acceptance of clinicians to the  
19 intermittent monitoring intervention. Second, infants who are on supplemental oxygen  
20 and have a stable clinical status are eligible for randomization. Third, we are using the  
21 same target oxygen saturation in both groups. Fourth, it is important to take a multi-  
22 faceted approach to supporting this practice change to ensure adherence to the allocated  
23 arm and success of the trial. We have obtained support from clinical leadership including  
24 nursing, physicians, respiratory therapists and hospital administrators. We will also target  
25 groups using opinion leaders using small group sessions and support front line clinicians.  
26  
27

28  
29 We took the approach of not blinding clinicians and parents to the allocated monitoring  
30 strategy in this trial for several reasons. First, it is important to simulate the monitoring  
31 strategy intended with fidelity. The act of continuous or intermittent monitoring of  
32 oxygen saturation may alter the clinical assessments of treating nurses and physicians and  
33 their decisions regarding oxygen use and need for additional days of hospitalization as  
34 well as parental perceptions of their child's health. For example, previous researchers  
35 have suggested that continuous oxygen saturation monitoring results in overreliance in  
36 technology and under reliance of clinical assessment, which leads to over use of oxygen  
37 and longer hospital stay. Thus, we are interested in understanding if knowledge of  
38 treatment arm affects clinician behavior and decisions around oxygen use and length of  
39 stay, assuming the same target oxygen saturation of 90% in both groups. By taking this  
40 approach, our estimates of effectiveness will be more applicable to usual care settings. In  
41 pragmatic trials, it has been suggested that unblinded treatment and assessment of clinical  
42 outcomes may be important for the preservation of the 'ecology of care', since blinding  
43 may have a significant effect on patients' experience.<sup>30, 31</sup> Further, the inclusion of  
44 objective outcome measures may reduce the potential for bias resulting from patients'  
45 expectations about the effectiveness of each treatment. Our primary outcome measure is  
46 an objective measure of length of hospital stay. Second, although methods are available  
47 to blind group assignment in monitoring trials (e.g. providing a non-true continuous  
48 reading in between intermittent oximetry spot checks), this would ostensibly result in  
49 comparing two continuous monitoring arms. Third, as we are also measuring discharge  
50 readiness as a secondary outcome (defined by the child's clinical status) we will be able  
51 to assess differences between both arms in discharge readiness and total length of stay.  
52  
53  
54  
55  
56  
57  
58  
59  
60



## REFERENCES

1. Ralston S, Lieberthal AS, Meissner HC, Alverson BK, Baley JE, Gadomski AM et al. Clinical Practice Guideline: The diagnosis, management and prevention of bronchiolitis. *Paediatrics*. Published online October 27, 2014. DOI:10.1542/peds.2014-2742.
2. Smyth RL, Openshaw PJM. Bronchiolitis. *Lancet*. 2006;368:312-322.
3. Shay DK et al. Bronchiolitis-associated hospitalization among US children, 1980-1996. *JAMA*. 1999. 282 (15): 1440-1446.
4. Keren R, Luan X, Localio R, Hall M, McLeoad L, Dai D, Srivastava R. Prioritization of comparative effectiveness research topics in hospital paediatrics. *Arch Pediatr Adol Med*. 2012; 166:1155-1164
5. Spurling GKP, Doust J, Del Mar CB, Eriksson L. Antibiotics for bronchiolitis in children. *Cochrane Database of Systematic Reviews*. 2011, Issue 6. Art. No.: CD005189. DOI: 10.1002/14651858.CD005189.pub3.
6. Hartling L, Bialy LM, Vandermeer B, Tjosvold L, Johnson DW, Plint AC, Klassen TP, Patel H, Fernandes RM. Epinephrine for bronchiolitis. *Cochrane Database of Systematic Reviews*. 2011, Issue 6. Art.No.:CD003123.DOI: 10.1002/14651858.CD003123.pub3.
7. Gadomski AM, Brower M. Bronchodilators for bronchiolitis. *Cochrane Database of Systematic Reviews*. 2010, Issue 12. Art. No.: CD001266. DOI: 10.1002/14651858.CD001266.pub3.
8. Fernandes RM, Bialy LM, Vandermeer B, Tjosvold L, Plint AC, Patel H, Johnson DW, Klassen TP, Hartling L. Glucocorticoids for acute viral bronchiolitis in infants and young children. *Cochrane Database of Systematic Reviews*. 2010, Issue 10. Art. No.: CD004878. DOI: 10.1002/14651858.CD004878.pub3.
9. Hartling L, Fernandes RM, Bialy L, et al. Steroids and bronchodilators for acute bronchiolitis in the first two years of life: Systematic review and meta-analysis. *BMJ*. 2011;342.
10. Fouzas S, Priftis KN, Anthracopoulos MB. Pulse oximetry in paediatric practice. *Paediatrics*. 2011;128(4):740-752.
11. Schroeder AR, Marmor AK, Pantell MD, Newman TB. Impact of pulse oximetry and oxygen therapy on length of stay in bronchiolitis hospitalizations. *Arch Pediatr Adol Med*. 2004. 158: 527-530.
12. Unger S, Cunningham S. Effect of oxygen supplementation on length of stay for infants hospitalized with acute viral bronchiolitis. *Paediatrics*. 2008. 121: 470-475.

- 1  
2  
3 13. Mallory MD, Shay DK, Garrett J, Bordley WC. Bronchiolitis management  
4 preferences and the influence of pulse oximetry and respiratory rate on the decision to  
5 admit. *Paediatrics*. 2003. 111: e45-e51.  
6  
7  
8 14. Schuh S, Freedman S, Coates A, Allen U, Parkin PC, Stephens D, Ungar W, DaSilva  
9 Z, Willan AR. Effect of oximetry on hospitalization in bronchiolitis: A randomized  
10 clinical trial. *JAMA*. 2014;312:712-718. □  
11  
12 15. Vinci R, Bauchner H. Bronchiolitis, deception in research, and clinical decision  
13 making. *JAMA*. 2014;312:699-700. □  
14  
15 16. McCulloh R, Koster M, Ralston S et al. Use of intermittent vs. continuous pulse  
16 oximetry for nonhypoxemic infants and young children hospitalized for bronchiolitis: A  
17 randomized clinical trial. *JAMA Pediatr*.2015;169(10):898-904.  
18  
19 17. Cunningham S. Intermittent monitoring of oxygen saturation in infants and children  
20 with acute bronchiolitis: Peekaboo paediatrics or good clinical care? *JAMA Pediatr*.  
21 2015;169(10), 891-892.  
22  
23 18. Chopra V, McMahon LF. Redesigning hospital alarms for patient safety: Alarmed  
24 and potentially dangerous. *JAMA*. 2014; 311:1199-1200. □  
25  
26 19. Cvach M. Monitor alarm fatigue: An integrative review. *Biomedical Instrumentation*  
27 *and Technology*. 2010; 268-277.  
28  
29 20. The Joint Commission. The Joint Commission Announces 2014 National Patient  
30 Safety Goal.  
31 [http://www.jointcommission.org/assets/1/18/jcp0713\\_announce\\_new\\_nspg.pdf](http://www.jointcommission.org/assets/1/18/jcp0713_announce_new_nspg.pdf). Accessed  
32 March 20, 2015.  
33  
34 21. Coon ER, Quinonez RA, Moyer VA, Schroeder AR. Overdiagnosis: How our  
35 compulsion for diagnosis may be harming children. *Paediatrics*.2014;134:1-11.  
36  
37 22. Chan A-W, Tetzlaff JM, Altman DG et al. SPIRIT 2013 Statement: Defining standard  
38 protocol items for clinical trials. *Ann Intern Med* 2013;158:200-207.  
39  
40 23. Thorpe KE, Zwarenstein M, Oxman AD, Treweek S, Furberg CD, Altman DG, Tunis  
41 S, Bergel E, Harvey I, Magid DJ, Chalkidou K. A pragmatic–explanatory continuum  
42 indicator summary (PRECIS): a tool to help trial designers. *CMAJ*. 2009;180:E47-E57.  
43  
44 24. Cunningham S, Rodriguez A, Adams T, et al. Oxygen saturation targets in infants  
45 with bronchiolitis (BIDS): a double-blind, randomized, equivalence trial. *Lancet*.  
46 2015;386:1041-1048.  
47  
48  
49  
50  
51  
52  
53  
54  
55  
56  
57  
58  
59  
60

- 1  
2  
3 25. Langley JM, Wang EEL, Law BJ, et al. Economic evaluation of respiratory syncytial  
4 virus infection in Canadian children: A paediatric investigators collaborative network on  
5 infections in Canada (PICNIC) study. *J Pediatr*. 1997;131(1):113-117.  
6  
7  
8 26. Patel H, Gouin S, Platt RW. Randomized, double-blind, placebo-controlled trial of  
9 oral albuterol in infants with mild-to-moderate acute viral bronchiolitis. *J Pediatr*.  
10 2003;142(5):509-514.  
11  
12 27. Kuzik BA, Al Qadhi SA, Kent S, et al. Nebulized hypertonic saline in the treatment  
13 of viral bronchiolitis in infants. *J Pediatr*. 2007;151(3):266-270. e1.  
14  
15  
16 28. Spielberger, C.D., Gorsuch, R.L., Lushene, P.R., Vagg, P.R., & Jacobs, G.A (1983).  
17 Manual for the State-Trait Anxiety Inventory. Consulting Psychologists Press, Inc  
18  
19 29. Petruzella FD, Gorelick MH. Duration of illness in infants with bronchiolitis  
20 evaluated in the emergency department. *Paediatrics*. 2010;126(2):285.  
21  
22 30. Zwarenstein M, Treweek S, Gagnier JJ, et al. Improving the reporting of pragmatic  
23 trials: An extension of the CONSORT statement. *BMJ*. 2008;337:a2390.  
24  
25  
26 31. Ware JH, Hamel MB. Pragmatic Trials – Guides to Better Care? *NEJM*. 2011.  
27 364:1685-1687.  
28  
29  
30 32. Moineddin R, Nie JX, Domb G, Leong AM, Upshur REG. Seasonality of primary  
31 care utilization of respiratory diseases in Ontario: A time-series analysis. *BMC Health*  
32 *Serv Res*. 2008. 8:160. □  
33  
34 33. Ontario Case Costing Initiative. 2015. Ontario Ministry of Health and Long-Term  
35 Care. Available at <http://www.occp.com/mainPage.htm>. □  
36  
37 34. Health Data Branch Web Portal. 2015. Ontario Ministry of Health and Long-Term  
38 Care. Available at <https://hsimi.on.ca/hdbportal/>. □  
39  
40  
41 35. Dyson MP, Shave K, Gates A, et al. Which outcomes are important to patients and  
42 families who have experienced paediatric acute respiratory illness? Findings from a  
43 mixed methods sequential exploratory study. *BMJ Open* 2017;7:e018199. doi:10.1136/  
44 *bmjopen-2017-018199*  
45

#### 46 **Authors' contributions**

47 SM conceived and designed the study and drafted the first version of the manuscript. GW  
48 conceived the study and participated in the design and manuscript revisions. PP  
49 conceived and designed the study and revised the manuscript. LG, CP, RK, AB, MR,  
50 MS, NK, KBR, ML, LP, MEM, AW, and SS participated in the design of the study and  
51 manuscript revisions. All authors read and revised the manuscript critically for important  
52 intellectual content and approved the final manuscript.  
53  
54  
55  
56  
57  
58  
59  
60

### **Funding statement**

This pilot study was funded by a peer-reviewed grant from the Paediatric Consultants Partnership, Hospital for Sick Children. It was also supported by the Paediatric Outcomes Research Team, Hospital for Sick Children, which receives funding from the SickKids Foundation, Toronto. The multicentre trial is funded by a grant from the Canadian Institutes of Health Research (funding reference number PJT-148635). Funders were not involved in any way in the design, collection, analysis, interpretation of data, writing of the manuscript, or the decision to submit the manuscript for publication.

### **Competing interests**

The authors declare that they have no competing interests.

### **Figure Legends**

Figure 1. Trial Schematic

Figure 2. Schedule of enrolment, interventions, and assessments

\*ED=emergency department

Patients who are eligible are approached once they meet clinical stability criteria during the hospitalization. This maybe on the first day of hospitalization or subsequent days. The intervention is applied until discharge and follow-up occurs after 15 days post discharge.

Figure 1. Trial Schematic

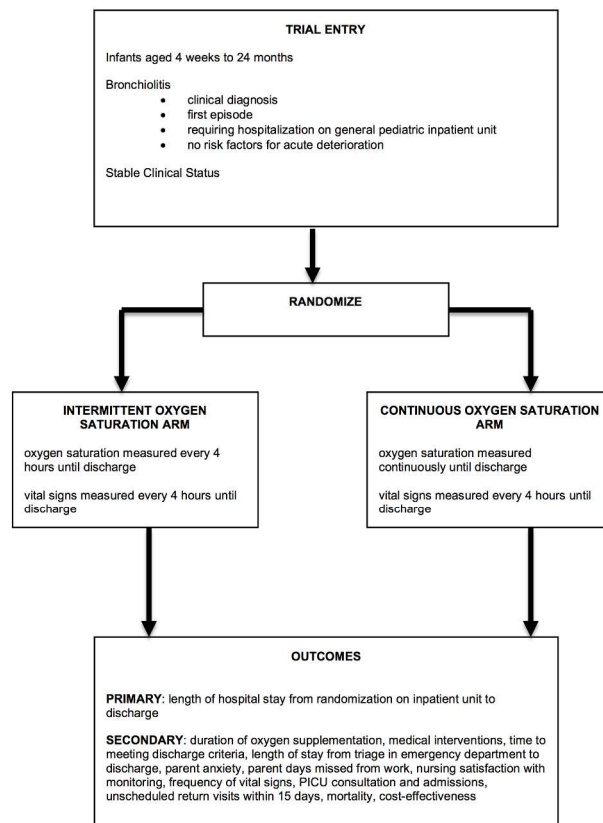

Figure 1. Trial Schematic

215x279mm (300 x 300 DPI)

Figure 2. Schedule of enrolment, interventions, and assessments

| TIMEPOINT**                                                                                                                                                                                     | Enrolment          | Allocation                | Post-allocation             |                             |                             |                         |                        | Close out             |
|-------------------------------------------------------------------------------------------------------------------------------------------------------------------------------------------------|--------------------|---------------------------|-----------------------------|-----------------------------|-----------------------------|-------------------------|------------------------|-----------------------|
|                                                                                                                                                                                                 | Hospital Admission | Hospital day <sub>0</sub> | Hospital day <sub>0+1</sub> | Hospital day <sub>0+2</sub> | Hospital day <sub>0+7</sub> | Discharge from hospital | 15 days post discharge | Recruitment completed |
| <b>ENROLMENT:</b>                                                                                                                                                                               |                    |                           |                             |                             |                             |                         |                        |                       |
| Eligibility screen                                                                                                                                                                              | X                  | X                         |                             |                             |                             |                         |                        |                       |
| Informed consent                                                                                                                                                                                |                    | X                         |                             |                             |                             |                         |                        |                       |
| Allocation                                                                                                                                                                                      |                    | X                         |                             |                             |                             |                         |                        |                       |
| <b>INTERVENTIONS:</b>                                                                                                                                                                           |                    |                           |                             |                             |                             |                         |                        |                       |
| Intermittent Oxygen Saturation Monitoring                                                                                                                                                       |                    | X                         | X                           | X                           | X                           | X                       |                        |                       |
| Continuous Oxygen Saturation Monitoring                                                                                                                                                         |                    | X                         | X                           | X                           | X                           | X                       |                        |                       |
| <b>ASSESSMENTS:</b>                                                                                                                                                                             |                    |                           |                             |                             |                             |                         |                        |                       |
| Baseline clinical and demographic data                                                                                                                                                          | X                  | X                         |                             |                             |                             |                         |                        |                       |
| Primary outcome: Time (hours) from randomization to discharge from hospital                                                                                                                     |                    |                           |                             |                             |                             | X                       |                        |                       |
| Secondary outcomes: duration of oxygen supplementation, medical interventions, time to meeting discharge criteria, length of hospital stay from ED, parent anxiety, PICU admission/consultation |                    |                           |                             |                             |                             | X                       |                        |                       |
| Nursing satisfaction                                                                                                                                                                            |                    | X                         | X                           | X                           | X                           | X                       |                        |                       |
| Parent days missed from work, unscheduled return to care within 15 days of discharge, mortality                                                                                                 |                    |                           |                             |                             |                             |                         | X                      |                       |
| Cost-effectiveness                                                                                                                                                                              |                    |                           |                             |                             |                             |                         |                        | X                     |

\*ED=emergency department  
 † Patients who are eligible are approached once they meet clinical stability criteria during the hospitalization. This maybe on the first day of hospitalization or subsequent days. The intervention is applied until discharge and follow-up occurs after 15 days post discharge.

Figure 2. Schedule of enrolment, interventions, and assessments!! † !!

† \*ED=emergency department!! † Patients who are eligible are approached once they meet clinical stability criteria during the hospitalization. This maybe on the first day of hospitalization or subsequent days. The intervention is applied until discharge and follow-up occurs after 15 days post discharge. !! †

279x215mm (300 x 300 DPI)

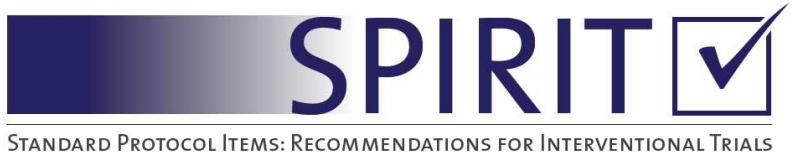

SPIRIT 2013 Checklist: Recommended items to address in a clinical trial protocol and related documents\*

| Section/item                      | Item No | Description                                                                                                                                                                                                                                                                              | Addressed on page number |
|-----------------------------------|---------|------------------------------------------------------------------------------------------------------------------------------------------------------------------------------------------------------------------------------------------------------------------------------------------|--------------------------|
| <b>Administrative information</b> |         |                                                                                                                                                                                                                                                                                          |                          |
| Title                             | 1       | Descriptive title identifying the study design, population, interventions, and, if applicable, trial acronym                                                                                                                                                                             | ___ 1 ___                |
| Trial registration                | 2a      | Trial identifier and registry name. If not yet registered, name of intended registry                                                                                                                                                                                                     | ___ 4 ___                |
|                                   | 2b      | All items from the World Health Organization Trial Registration Data Set                                                                                                                                                                                                                 | __Table 1__              |
| Protocol version                  | 3       | Date and version identifier                                                                                                                                                                                                                                                              | ___ 3 ___                |
| Funding                           | 4       | Sources and types of financial, material, and other support                                                                                                                                                                                                                              | ___ 18 ___               |
| Roles and responsibilities        | 5a      | Names, affiliations, and roles of protocol contributors                                                                                                                                                                                                                                  | ___ 1-3,18 ___           |
|                                   | 5b      | Name and contact information for the trial sponsor                                                                                                                                                                                                                                       | ___ 3 ___                |
|                                   | 5c      | Role of study sponsor and funders, if any, in study design; collection, management, analysis, and interpretation of data; writing of the report; and the decision to submit the report for publication, including whether they will have ultimate authority over any of these activities | ___ 18 ___               |
|                                   | 5d      | Composition, roles, and responsibilities of the coordinating centre, steering committee, endpoint adjudication committee, data management team, and other individuals or groups overseeing the trial, if applicable (see Item 21a for data monitoring committee)                         | ___ 13 ___               |

## Introduction

|                          |    |                                                                                                                                                                                                           |         |
|--------------------------|----|-----------------------------------------------------------------------------------------------------------------------------------------------------------------------------------------------------------|---------|
| Background and rationale | 6a | Description of research question and justification for undertaking the trial, including summary of relevant studies (published and unpublished) examining benefits and harms for each intervention        | __6,7__ |
|                          | 6b | Explanation for choice of comparators                                                                                                                                                                     | __6,__  |
| Objectives               | 7  | Specific objectives or hypotheses                                                                                                                                                                         | __7__   |
| Trial design             | 8  | Description of trial design including type of trial (eg, parallel group, crossover, factorial, single group), allocation ratio, and framework (eg, superiority, equivalence, noninferiority, exploratory) | __7__   |

## Methods: Participants, interventions, and outcomes

|                      |     |                                                                                                                                                                                                                                                                                                                                                                                |           |
|----------------------|-----|--------------------------------------------------------------------------------------------------------------------------------------------------------------------------------------------------------------------------------------------------------------------------------------------------------------------------------------------------------------------------------|-----------|
| Study setting        | 9   | Description of study settings (eg, community clinic, academic hospital) and list of countries where data will be collected. Reference to where list of study sites can be obtained                                                                                                                                                                                             | __8__     |
| Eligibility criteria | 10  | Inclusion and exclusion criteria for participants. If applicable, eligibility criteria for study centres and individuals who will perform the interventions (eg, surgeons, psychotherapists)                                                                                                                                                                                   | __8,9__   |
| Interventions        | 11a | Interventions for each group with sufficient detail to allow replication, including how and when they will be administered                                                                                                                                                                                                                                                     | __10__    |
|                      | 11b | Criteria for discontinuing or modifying allocated interventions for a given trial participant (eg, drug dose change in response to harms, participant request, or improving/worsening disease)                                                                                                                                                                                 | __10__    |
|                      | 11c | Strategies to improve adherence to intervention protocols, and any procedures for monitoring adherence (eg, drug tablet return, laboratory tests)                                                                                                                                                                                                                              | __10__    |
|                      | 11d | Relevant concomitant care and interventions that are permitted or prohibited during the trial                                                                                                                                                                                                                                                                                  | __10,11__ |
| Outcomes             | 12  | Primary, secondary, and other outcomes, including the specific measurement variable (eg, systolic blood pressure), analysis metric (eg, change from baseline, final value, time to event), method of aggregation (eg, median, proportion), and time point for each outcome. Explanation of the clinical relevance of chosen efficacy and harm outcomes is strongly recommended | __11,12__ |



|    |                      |    |                                                                                                                                                                                       |           |
|----|----------------------|----|---------------------------------------------------------------------------------------------------------------------------------------------------------------------------------------|-----------|
| 1  |                      |    |                                                                                                                                                                                       |           |
| 2  |                      |    |                                                                                                                                                                                       |           |
| 3  | Participant timeline | 13 | Time schedule of enrolment, interventions (including any run-ins and washouts), assessments, and visits for participants. A schematic diagram is highly recommended (see Figure)      | Figure 2  |
| 4  |                      |    |                                                                                                                                                                                       |           |
| 5  | Sample size          | 14 | Estimated number of participants needed to achieve study objectives and how it was determined, including clinical and statistical assumptions supporting any sample size calculations | __13,14__ |
| 6  |                      |    |                                                                                                                                                                                       |           |
| 7  |                      |    |                                                                                                                                                                                       |           |
| 8  | Recruitment          | 15 | Strategies for achieving adequate participant enrolment to reach target sample size                                                                                                   | __10__    |
| 9  |                      |    |                                                                                                                                                                                       |           |
| 10 |                      |    |                                                                                                                                                                                       |           |

### 11 **Methods: Assignment of interventions (for controlled trials)**

#### 12 Allocation:

|    |                                  |     |                                                                                                                                                                                                                                                                                                                                                          |        |
|----|----------------------------------|-----|----------------------------------------------------------------------------------------------------------------------------------------------------------------------------------------------------------------------------------------------------------------------------------------------------------------------------------------------------------|--------|
| 13 |                                  |     |                                                                                                                                                                                                                                                                                                                                                          |        |
| 14 |                                  |     |                                                                                                                                                                                                                                                                                                                                                          |        |
| 15 | Sequence generation              | 16a | Method of generating the allocation sequence (eg, computer-generated random numbers), and list of any factors for stratification. To reduce predictability of a random sequence, details of any planned restriction (eg, blocking) should be provided in a separate document that is unavailable to those who enrol participants or assign interventions | __12__ |
| 16 |                                  |     |                                                                                                                                                                                                                                                                                                                                                          |        |
| 17 |                                  |     |                                                                                                                                                                                                                                                                                                                                                          |        |
| 18 |                                  |     |                                                                                                                                                                                                                                                                                                                                                          |        |
| 19 |                                  |     |                                                                                                                                                                                                                                                                                                                                                          |        |
| 20 | Allocation concealment mechanism | 16b | Mechanism of implementing the allocation sequence (eg, central telephone; sequentially numbered, opaque, sealed envelopes), describing any steps to conceal the sequence until interventions are assigned                                                                                                                                                | __12__ |
| 21 |                                  |     |                                                                                                                                                                                                                                                                                                                                                          |        |
| 22 |                                  |     |                                                                                                                                                                                                                                                                                                                                                          |        |
| 23 |                                  |     |                                                                                                                                                                                                                                                                                                                                                          |        |
| 24 | Implementation                   | 16c | Who will generate the allocation sequence, who will enrol participants, and who will assign participants to interventions                                                                                                                                                                                                                                | __12__ |
| 25 |                                  |     |                                                                                                                                                                                                                                                                                                                                                          |        |
| 26 |                                  |     |                                                                                                                                                                                                                                                                                                                                                          |        |
| 27 | Blinding (masking)               | 17a | Who will be blinded after assignment to interventions (eg, trial participants, care providers, outcome assessors, data analysts), and how                                                                                                                                                                                                                | __13__ |
| 28 |                                  |     |                                                                                                                                                                                                                                                                                                                                                          |        |
| 29 |                                  |     |                                                                                                                                                                                                                                                                                                                                                          |        |
| 30 |                                  | 17b | If blinded, circumstances under which unblinding is permissible, and procedure for revealing a participant's allocated intervention during the trial                                                                                                                                                                                                     | __13__ |
| 31 |                                  |     |                                                                                                                                                                                                                                                                                                                                                          |        |
| 32 |                                  |     |                                                                                                                                                                                                                                                                                                                                                          |        |
| 33 |                                  |     |                                                                                                                                                                                                                                                                                                                                                          |        |

### 34 **Methods: Data collection, management, and analysis**

|    |                         |     |                                                                                                                                                                                                                                                                                                                                                                                                              |        |
|----|-------------------------|-----|--------------------------------------------------------------------------------------------------------------------------------------------------------------------------------------------------------------------------------------------------------------------------------------------------------------------------------------------------------------------------------------------------------------|--------|
| 35 |                         |     |                                                                                                                                                                                                                                                                                                                                                                                                              |        |
| 36 | Data collection methods | 18a | Plans for assessment and collection of outcome, baseline, and other trial data, including any related processes to promote data quality (eg, duplicate measurements, training of assessors) and a description of study instruments (eg, questionnaires, laboratory tests) along with their reliability and validity, if known. Reference to where data collection forms can be found, if not in the protocol | __13__ |
| 37 |                         |     |                                                                                                                                                                                                                                                                                                                                                                                                              |        |
| 38 |                         |     |                                                                                                                                                                                                                                                                                                                                                                                                              |        |
| 39 |                         |     |                                                                                                                                                                                                                                                                                                                                                                                                              |        |
| 40 |                         |     |                                                                                                                                                                                                                                                                                                                                                                                                              |        |
| 41 |                         |     |                                                                                                                                                                                                                                                                                                                                                                                                              |        |
| 42 |                         |     |                                                                                                                                                                                                                                                                                                                                                                                                              |        |
| 43 |                         |     |                                                                                                                                                                                                                                                                                                                                                                                                              |        |
| 44 |                         |     |                                                                                                                                                                                                                                                                                                                                                                                                              |        |
| 45 |                         |     |                                                                                                                                                                                                                                                                                                                                                                                                              |        |
| 46 |                         |     |                                                                                                                                                                                                                                                                                                                                                                                                              |        |
| 47 |                         |     |                                                                                                                                                                                                                                                                                                                                                                                                              |        |

|    |                                 |     |                                                                                                                                                                                                                                                                                                                                       |
|----|---------------------------------|-----|---------------------------------------------------------------------------------------------------------------------------------------------------------------------------------------------------------------------------------------------------------------------------------------------------------------------------------------|
| 1  |                                 |     |                                                                                                                                                                                                                                                                                                                                       |
| 2  |                                 |     |                                                                                                                                                                                                                                                                                                                                       |
| 3  |                                 | 18b | Plans to promote participant retention and complete follow-up, including list of any outcome data to be collected for participants who discontinue or deviate from intervention protocols                                                                                                                                             |
| 4  |                                 |     | __10__                                                                                                                                                                                                                                                                                                                                |
| 5  |                                 |     |                                                                                                                                                                                                                                                                                                                                       |
| 6  | Data management                 | 19  | Plans for data entry, coding, security, and storage, including any related processes to promote data quality (eg, double data entry; range checks for data values). Reference to where details of data management procedures can be found, if not in the protocol                                                                     |
| 7  |                                 |     | __13__                                                                                                                                                                                                                                                                                                                                |
| 8  |                                 |     |                                                                                                                                                                                                                                                                                                                                       |
| 9  |                                 |     |                                                                                                                                                                                                                                                                                                                                       |
| 10 | Statistical methods             | 20a | Statistical methods for analysing primary and secondary outcomes. Reference to where other details of the statistical analysis plan can be found, if not in the protocol                                                                                                                                                              |
| 11 |                                 |     | __13,14__                                                                                                                                                                                                                                                                                                                             |
| 12 |                                 |     |                                                                                                                                                                                                                                                                                                                                       |
| 13 |                                 | 20b | Methods for any additional analyses (eg, subgroup and adjusted analyses)                                                                                                                                                                                                                                                              |
| 14 |                                 |     | __13,14__                                                                                                                                                                                                                                                                                                                             |
| 15 |                                 |     | __                                                                                                                                                                                                                                                                                                                                    |
| 16 |                                 | 20c | Definition of analysis population relating to protocol non-adherence (eg, as randomised analysis), and any statistical methods to handle missing data (eg, multiple imputation)                                                                                                                                                       |
| 17 |                                 |     | __14__                                                                                                                                                                                                                                                                                                                                |
| 18 |                                 |     |                                                                                                                                                                                                                                                                                                                                       |
| 19 |                                 |     |                                                                                                                                                                                                                                                                                                                                       |
| 20 | <b>Methods: Monitoring</b>      |     |                                                                                                                                                                                                                                                                                                                                       |
| 21 | Data monitoring                 | 21a | Composition of data monitoring committee (DMC); summary of its role and reporting structure; statement of whether it is independent from the sponsor and competing interests; and reference to where further details about its charter can be found, if not in the protocol. Alternatively, an explanation of why a DMC is not needed |
| 22 |                                 |     | __13__                                                                                                                                                                                                                                                                                                                                |
| 23 |                                 |     |                                                                                                                                                                                                                                                                                                                                       |
| 24 |                                 |     |                                                                                                                                                                                                                                                                                                                                       |
| 25 |                                 |     |                                                                                                                                                                                                                                                                                                                                       |
| 26 |                                 |     |                                                                                                                                                                                                                                                                                                                                       |
| 27 |                                 | 21b | Description of any interim analyses and stopping guidelines, including who will have access to these interim results and make the final decision to terminate the trial                                                                                                                                                               |
| 28 |                                 |     | __13__                                                                                                                                                                                                                                                                                                                                |
| 29 |                                 |     |                                                                                                                                                                                                                                                                                                                                       |
| 30 | Harms                           | 22  | Plans for collecting, assessing, reporting, and managing solicited and spontaneously reported adverse events and other unintended effects of trial interventions or trial conduct                                                                                                                                                     |
| 31 |                                 |     | __11,12__                                                                                                                                                                                                                                                                                                                             |
| 32 |                                 |     |                                                                                                                                                                                                                                                                                                                                       |
| 33 | Auditing                        | 23  | Frequency and procedures for auditing trial conduct, if any, and whether the process will be independent from investigators and the sponsor                                                                                                                                                                                           |
| 34 |                                 |     | __NA__                                                                                                                                                                                                                                                                                                                                |
| 35 |                                 |     |                                                                                                                                                                                                                                                                                                                                       |
| 36 | <b>Ethics and dissemination</b> |     |                                                                                                                                                                                                                                                                                                                                       |
| 37 |                                 |     |                                                                                                                                                                                                                                                                                                                                       |
| 38 | Research ethics approval        | 24  | Plans for seeking research ethics committee/institutional review board (REC/IRB) approval                                                                                                                                                                                                                                             |
| 39 |                                 |     | __15__                                                                                                                                                                                                                                                                                                                                |
| 40 |                                 |     |                                                                                                                                                                                                                                                                                                                                       |
| 41 |                                 |     |                                                                                                                                                                                                                                                                                                                                       |
| 42 |                                 |     |                                                                                                                                                                                                                                                                                                                                       |
| 43 |                                 |     |                                                                                                                                                                                                                                                                                                                                       |
| 44 |                                 |     |                                                                                                                                                                                                                                                                                                                                       |
| 45 |                                 |     |                                                                                                                                                                                                                                                                                                                                       |
| 46 |                                 |     |                                                                                                                                                                                                                                                                                                                                       |
| 47 |                                 |     |                                                                                                                                                                                                                                                                                                                                       |

|    |                      |     |                                                                                                                 |                |
|----|----------------------|-----|-----------------------------------------------------------------------------------------------------------------|----------------|
| 1  |                      |     |                                                                                                                 |                |
| 2  |                      |     |                                                                                                                 |                |
| 3  | Protocol             | 25  | Plans for communicating important protocol modifications (eg, changes to eligibility criteria, outcomes,        | __15__         |
| 4  | amendments           |     | analyses) to relevant parties (eg, investigators, REC/IRBs, trial participants, trial registries, journals,     |                |
| 5  |                      |     | regulators)                                                                                                     |                |
| 6  |                      |     |                                                                                                                 |                |
| 7  | Consent or assent    | 26a | Who will obtain informed consent or assent from potential trial participants or authorised surrogates, and      | __15__         |
| 8  |                      |     | how (see Item 32)                                                                                               |                |
| 9  |                      |     |                                                                                                                 |                |
| 10 |                      | 26b | Additional consent provisions for collection and use of participant data and biological specimens in ancillary  | __NA__         |
| 11 |                      |     | studies, if applicable                                                                                          |                |
| 12 |                      |     |                                                                                                                 |                |
| 13 | Confidentiality      | 27  | How personal information about potential and enrolled participants will be collected, shared, and maintained    | __15__         |
| 14 |                      |     | in order to protect confidentiality before, during, and after the trial                                         |                |
| 15 |                      |     |                                                                                                                 |                |
| 16 | Declaration of       | 28  | Financial and other competing interests for principal investigators for the overall trial and each study site   | 18__           |
| 17 | interests            |     |                                                                                                                 |                |
| 18 |                      |     |                                                                                                                 |                |
| 19 | Access to data       | 29  | Statement of who will have access to the final trial dataset, and disclosure of contractual agreements that     | __15__         |
| 20 |                      |     | limit such access for investigators                                                                             |                |
| 21 |                      |     |                                                                                                                 |                |
| 22 | Ancillary and post-  | 30  | Provisions, if any, for ancillary and post-trial care, and for compensation to those who suffer harm from trial | __NA__         |
| 23 | trial care           |     | participation                                                                                                   |                |
| 24 |                      |     |                                                                                                                 |                |
| 25 | Dissemination policy | 31a | Plans for investigators and sponsor to communicate trial results to participants, healthcare professionals,     | __15__         |
| 26 |                      |     | the public, and other relevant groups (eg, via publication, reporting in results databases, or other data       |                |
| 27 |                      |     | sharing arrangements), including any publication restrictions                                                   |                |
| 28 |                      |     |                                                                                                                 |                |
| 29 |                      | 31b | Authorship eligibility guidelines and any intended use of professional writers                                  | __15__         |
| 30 |                      |     |                                                                                                                 |                |
| 31 |                      | 31c | Plans, if any, for granting public access to the full protocol, participant-level dataset, and statistical code | __NA__         |
| 32 |                      |     |                                                                                                                 |                |
| 33 |                      |     |                                                                                                                 |                |
| 34 | <b>Appendices</b>    |     |                                                                                                                 |                |
| 35 |                      |     |                                                                                                                 |                |
| 36 | Informed consent     | 32  | Model consent form and other related documentation given to participants and authorised surrogates              | __available on |
| 37 | materials            |     |                                                                                                                 | request__      |
| 38 |                      |     |                                                                                                                 |                |
| 39 | Biological           | 33  | Plans for collection, laboratory evaluation, and storage of biological specimens for genetic or molecular       | __NA__         |
| 40 | specimens            |     | analysis in the current trial and for future use in ancillary studies, if applicable                            | __             |
| 41 |                      |     |                                                                                                                 |                |

1  
2 \*It is strongly recommended that this checklist be read in conjunction with the SPIRIT 2013 Explanation & Elaboration for important clarification on the items.  
3 Amendments to the protocol should be tracked and dated. The SPIRIT checklist is copyrighted by the SPIRIT Group under the Creative Commons  
4 "[Attribution-NonCommercial-NoDerivs 3.0 Unported](#)" license.  
5  
6  
7  
8  
9  
10  
11  
12  
13  
14  
15  
16  
17  
18  
19  
20  
21  
22  
23  
24  
25  
26  
27  
28  
29  
30  
31  
32  
33  
34  
35  
36  
37  
38  
39  
40  
41  
42  
43  
44  
45  
46  
47

For peer review only
