# Supplementary material for: Intermittent versus continuous oxygen saturation monitoring for infants hospitalised with bronchiolitis: study protocol for a pragmatic randomised controlled trial
Source: PubMed Central journal article supplement — BMJ Open. 2018 Apr 20;8(4):e022707. doi: 10.1136/bmjopen-2018-022707 (PMC5914772; doi:10.1136/bmjopen-2018-022707), 2018-04-20
Supplement: bmjopen-2018-022707.reviewer_comments.pdf [file bmjopen-2018-022707.reviewer_comments.pdf]

## PEER REVIEW HISTORY

BMJ Open publishes all reviews undertaken for accepted manuscripts. Reviewers are asked to complete a checklist review form (<http://bmjopen.bmj.com/site/about/resources/checklist.pdf>) and are provided with free text boxes to elaborate on their assessment. These free text comments are reproduced below.

## ARTICLE DETAILS

|                            |                                                                                                                                                                                                                                                              |
|----------------------------|--------------------------------------------------------------------------------------------------------------------------------------------------------------------------------------------------------------------------------------------------------------|
| <b>TITLE (PROVISIONAL)</b> | Intermittent vs. continuous oxygen saturation monitoring for infants hospitalized with bronchiolitis: study protocol for a pragmatic randomized controlled trial                                                                                             |
| <b>AUTHORS</b>             | Mahant, Sanjay; Wahi, Gita; Giglia, Luci; Pound, Catherine; Kanani, Ronik; Bayliss, Ann; Roy, Madan; Sakran, Mahmoud; Kozlowski, Natascha; Breein-Reid, Karen; Lavigne, Mollie; Premji, Laila; Moretti, Myla; Willan, Andy; Schuh, Suzanne; Parkin, Patricia |

This article was not externally reviewed at BMJ Open. Protocols that have been independently assessed prior to submission to BMJ Open are usually fast-tracked to publication on the grounds that further substantial changes will not be possible. This independent assessment will usually be external, independent review for both a substantial grant award from a non-commercial or government funder and ethics approval.
